# Supplementary material for: Spatial subcellular organelle networks in single cells
Source: PubMed Central journal article supplement (PMC10067843; doi:10.1038/s41598-023-32474-y), 2023-04-01
Supplement: 41598_2023_32474_MOESM1_ESM.pdf [file 41598_2023_32474_MOESM1_ESM.pdf]

# **Spatial subcellular organelle networks in single cells**

Mythreye Venkatesan<sup>1,2,3\*</sup>, Nicholas Zhang<sup>1,2\*</sup>, Benoit Marteau<sup>3</sup>, Yukina Yajima<sup>1</sup>, Nerea Ortiz De Zarate Garcia<sup>1,4</sup>, Zhou Fang<sup>1</sup>, Thomas Hu<sup>1,3</sup>, Shuangyi Cai<sup>1</sup>, Adam Ford<sup>1</sup>, Harrison Olszewski<sup>1</sup>, Andrew Borst<sup>1</sup>, and Ahmet F. Coskun<sup>1,2,5#</sup>

<sup>1</sup> Wallace H. Coulter Department of Biomedical Engineering, Georgia Institute of Technology and Emory University, Atlanta, GA, USA

<sup>2</sup> Interdisciplinary Bioengineering Graduate Program, Georgia Institute of Technology, Atlanta, GA, USA

<sup>3</sup> School of Electrical and Computer Engineering, Georgia Institute of Technology, Atlanta, GA, USA

<sup>4</sup> Departamento de Bioingenieria e Ingenieria Aeroespacial, Universidad Carlos III de Madrid

<sup>5</sup> Parker H. Petit Institute for Bioengineering and Bioscience, Georgia Institute of Technology, Atlanta, GA, USA

\*Equal contribution

#Corresponding author

Ahmet F. Coskun, Ph.D. ([ahmet.coskun@bme.gatech.edu](mailto:ahmet.coskun@bme.gatech.edu))

a

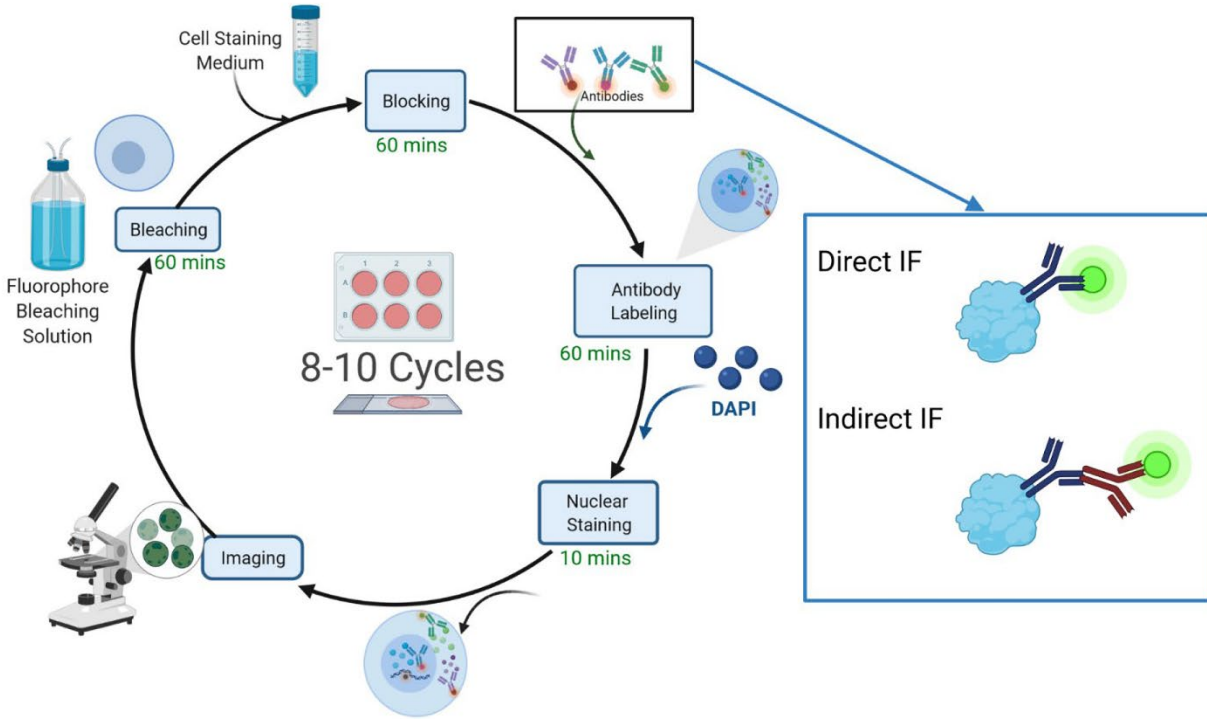

b

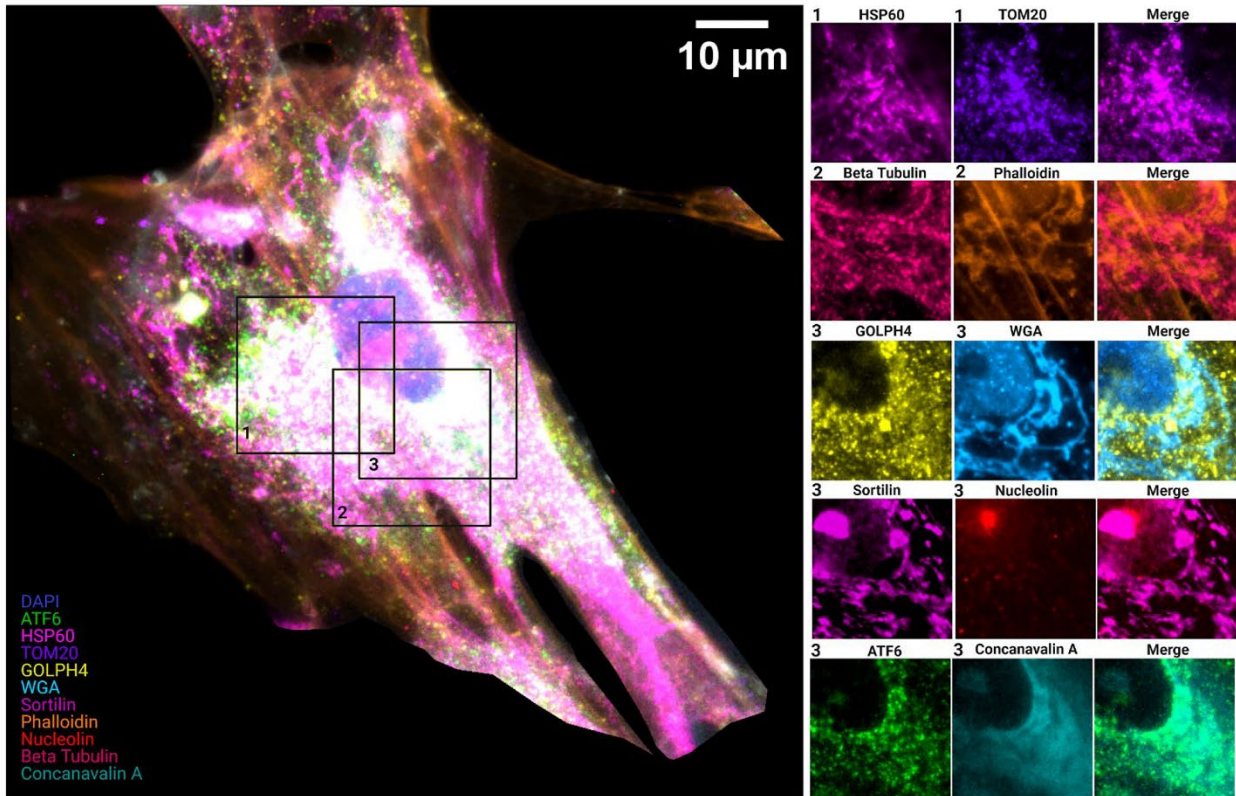

**Supplementary Figure 1. Rapid multiplexed immunofluorescence for high-dimensional spatial profiling in single cells.**

**(a)** Timeline for rapid multiplexed immunofluorescence staining. Each cycle consists of up to 3 antibodies plus DAPI. In between subsequent cycles, the antibodies were bleached and the same sample was re-blocked and stained with a new set of antibodies. Inset shows the difference between direct and indirect IF. While direct staining is a single-step process, indirect staining is a two-step requiring a primary antibody and a secondary antibody and is, therefore, more time-consuming. The duration of each step is labeled in green. Created with BioRender.com.

**(b)** 10-plex visualization of organelle markers in BM MSCs. On the right, zoomed-in regions are shown to illustrate regions of organelle colocalization and overlap of organelle marker presence. Row 1: HSP60 & TOM20, Row 2: Beta Tubulin & Phalloidin, Row 3: GOLPH4 & WGA, Row 4: Sortilin & Nucleolin, Row 5: ATF6 & Concanavalin A. The third column indicates the merge of the two markers in the first two columns.

a BM MSCs

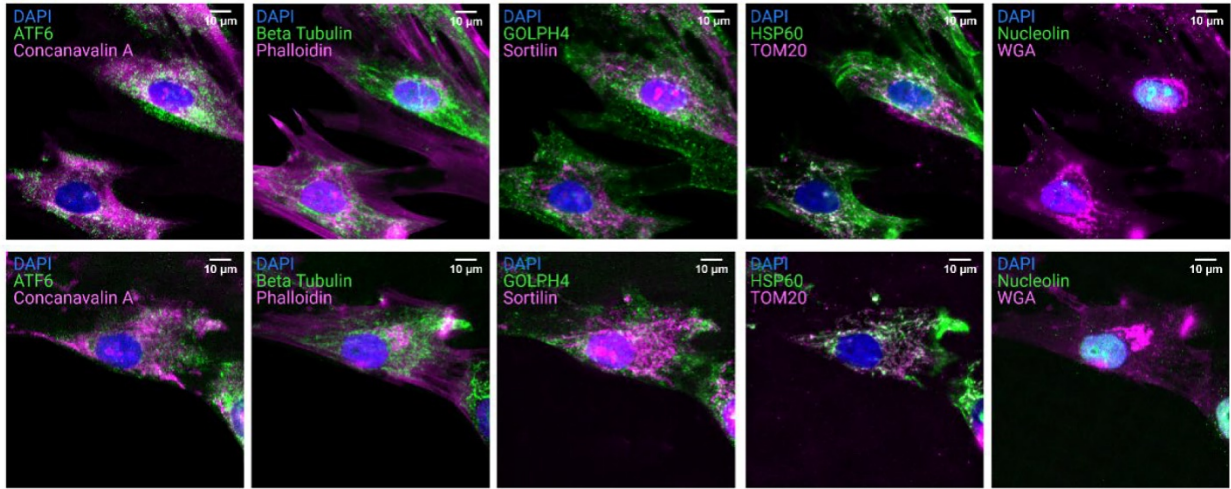

UC MSCs

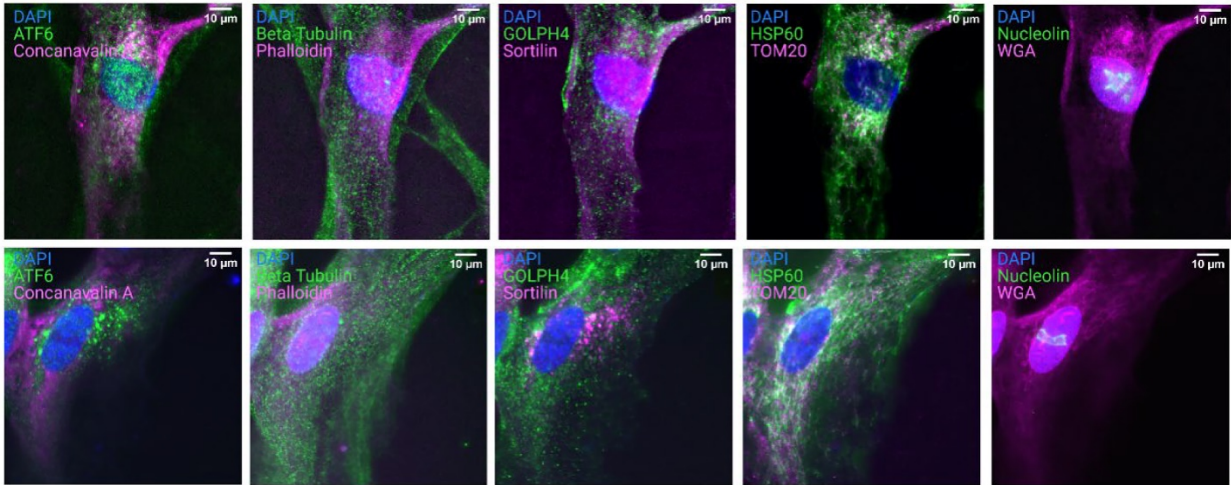

**Supplementary Figure 2. 10-plex Organelle mapping in mesenchymal stem cells.**

**(a)** Visualization of organelle markers in single cells from BM MSCs. Each row corresponds to a unique cell and each image displays two organelle markers. Column 1: ATF6 (green) & Concanavalin A (magenta), Column 2: Beta Tubulin (green) & Phalloidin (magenta), Column 3: GOLPH4 (green) & Sortilin (magenta), Column 4: HSP60 (green) & TOM20 (magenta), Column 5: Nucleolin (green) & WGA (magenta). All scale bars 10  $\mu\text{m}$ .

**(b)** Visualization of organelle markers in single cells from UC MSCs. Each row corresponds to a unique cell and each image displays two organelle markers. Column 1: ATF6 (green) & Concanavalin A (magenta), Column 2: Beta Tubulin (green) & Phalloidin (magenta), Column 3: GOLPH4 (green) & Sortilin (magenta), Column 4: HSP60 (green) & TOM20 (magenta), Column 5: Nucleolin (green) & WGA (magenta). All scale bars 10  $\mu\text{m}$ .



**a**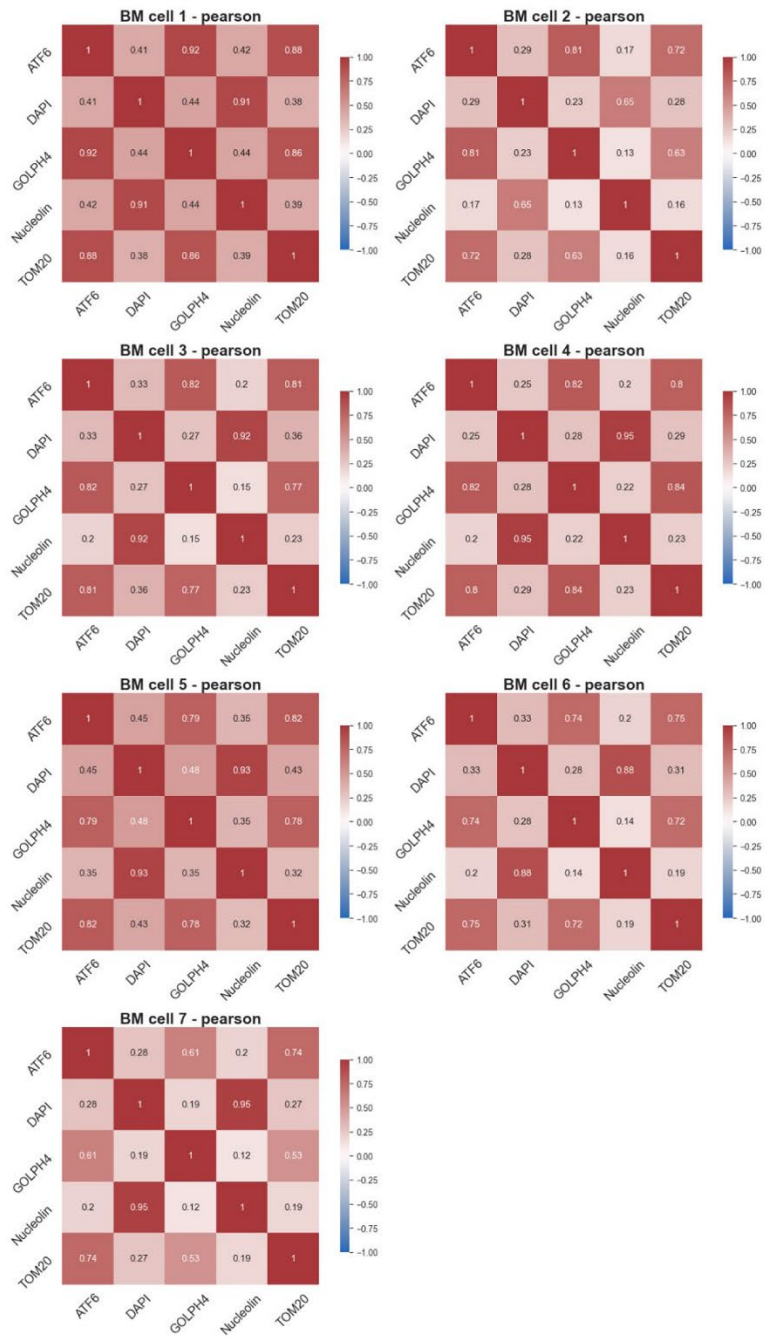**b**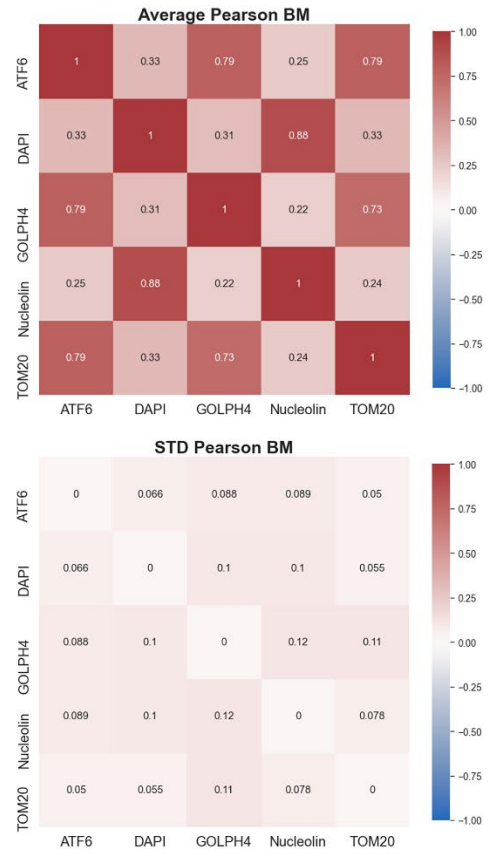

**Supplementary Figure 3. Pearson's correlation of markers in BM MSCs (n=7).**

**(a)** Correlation values of the total intensity of 5 markers (ATF6, DAPI, GOLPH4, Nucleolin, TOM20) in BM MSCs were calculated per marker for each cell using Pearson's Correlation and plotted as heatmaps. Pearson's correlation values range from -1 (blue) to +1 (red).

**(b)** Average (top) and standard deviation (bottom) of Pearson's correlation of intensity per marker across all BM MSCs for 5 markers (ATF6, DAPI, GOLPH4, Nucleolin, TOM20). The color bar ranges from -1 (blue) to +1 (red). Standard deviation values are close to 0 while average values agree well with every single cell in (a), indicating a more uniform organelle pattern among BM MSCs.

**a**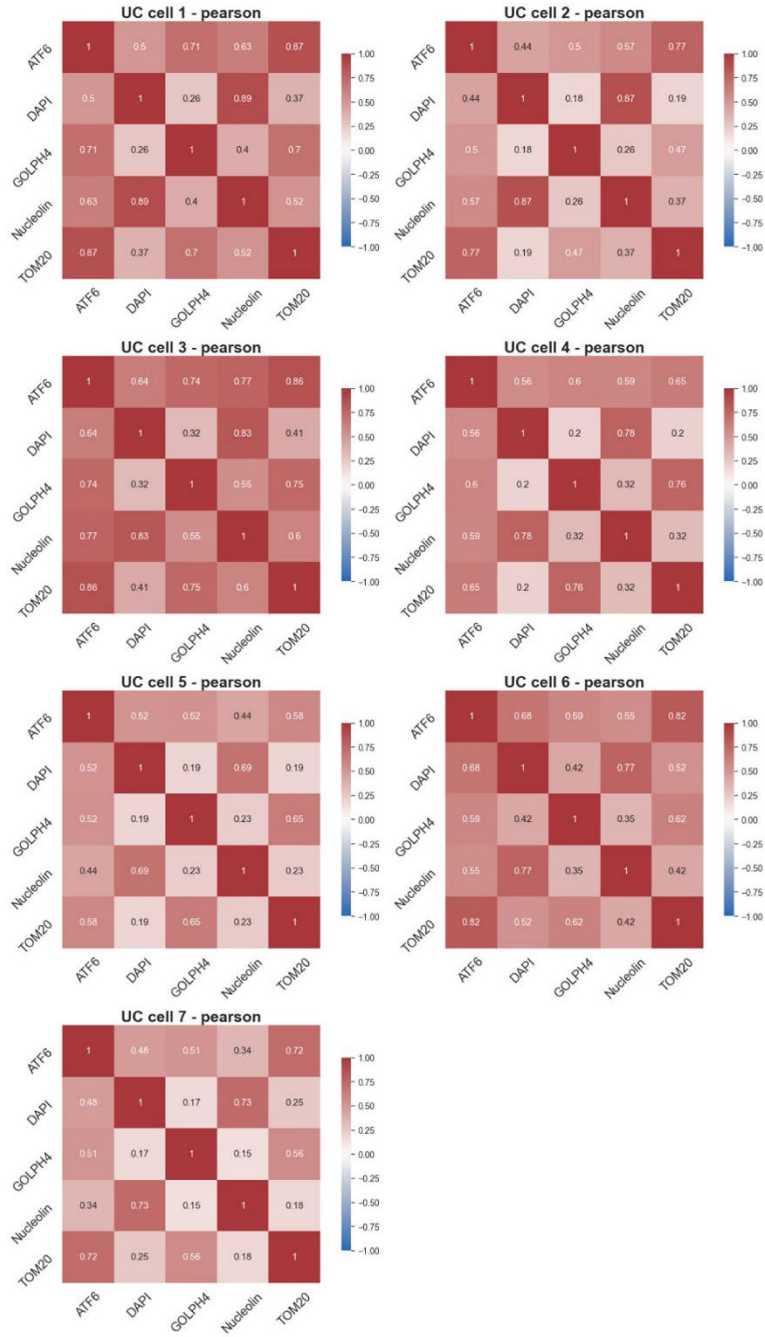**b**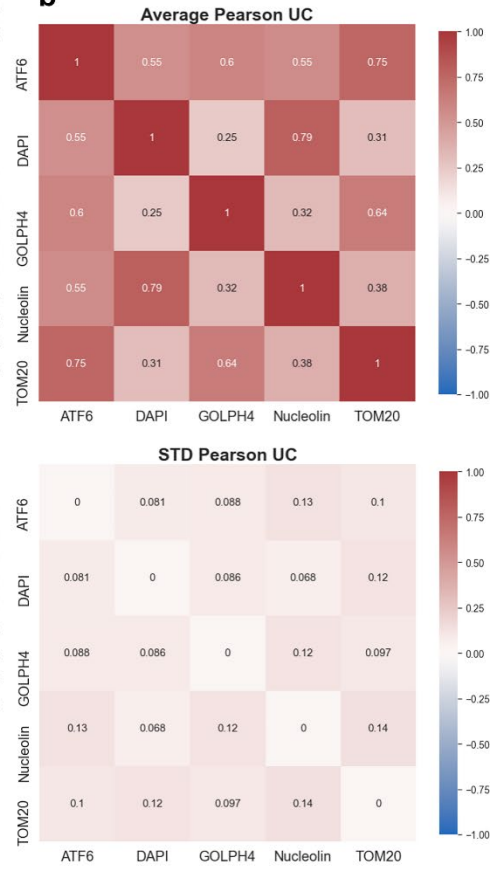



**Supplementary Figure 4. Pearson's correlation of markers in UC MSCs (n=7).**

**(a)** Correlation values of the total intensity of 5 markers (ATF6, DAPI, GOLPH4, Nucleolin, TOM20) in UC MSCs were calculated per marker for each cell using Pearson's Correlation and plotted as heatmaps. Pearson's correlation values range from -1 (blue) to +1 (red).

**(b)** Average (top) and standard deviation (bottom) of Pearson's correlation of intensity per marker across all UC MSCs for 5 markers (ATF6, DAPI, GOLPH4, Nucleolin, TOM20). The color bar ranges from -1 (blue) to +1 (red). Standard deviation values are close to 0 while average values agree well with every single cell in (a) except for UC cells 5 and 7, indicating a less uniform organelle pattern among UC MSCs.

**a**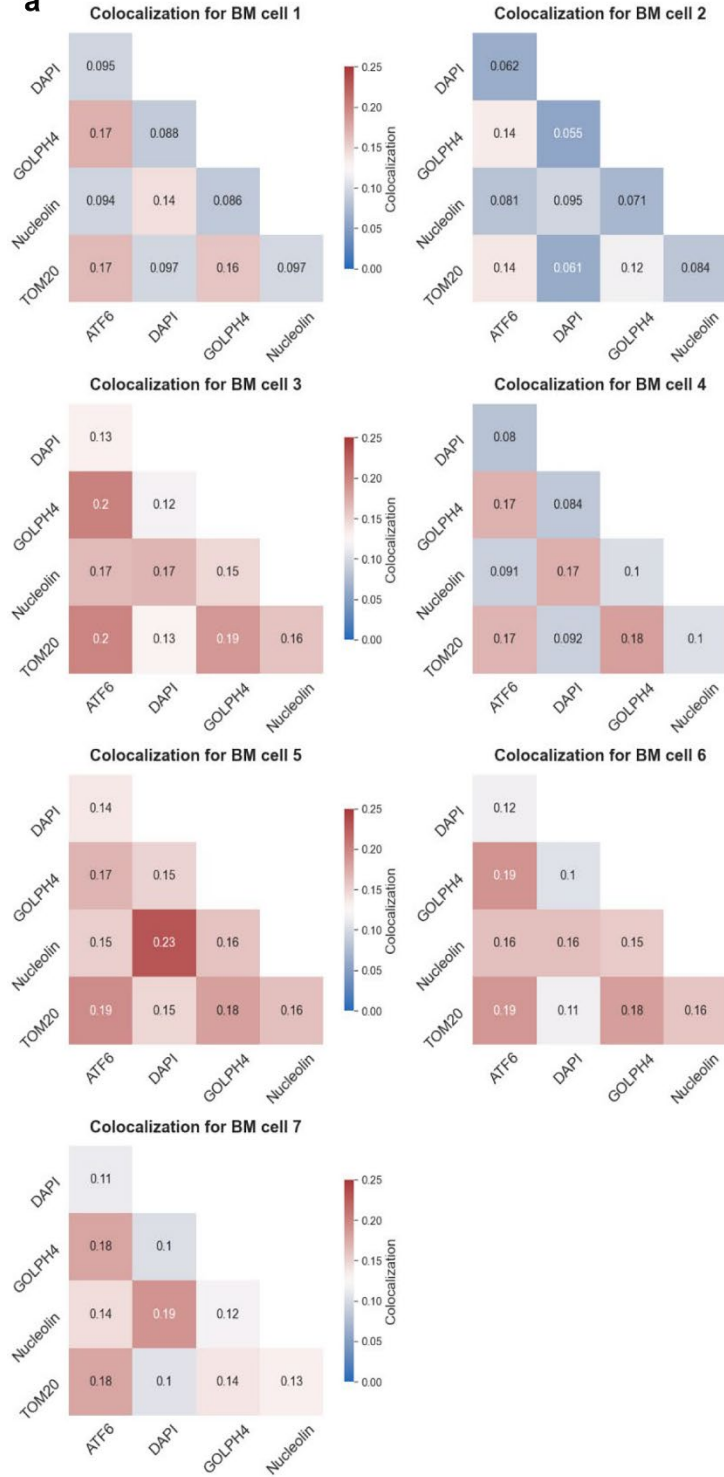**b**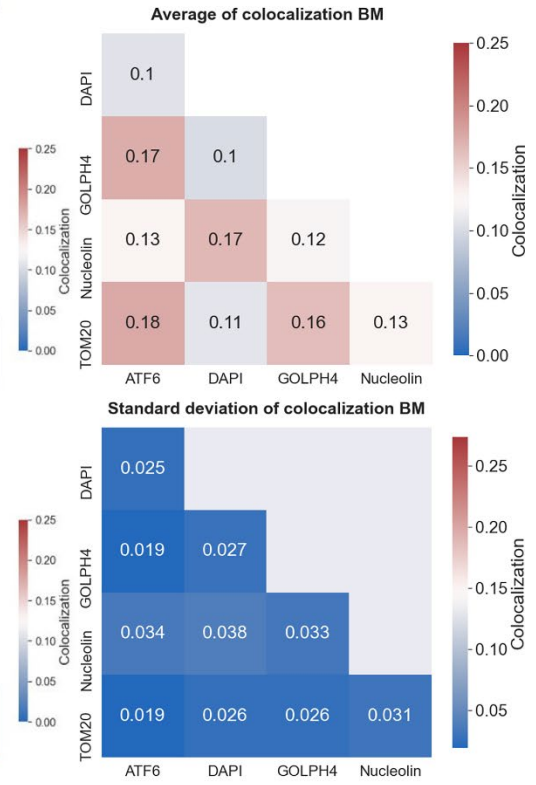

**Supplementary Figure 5. Pixel overlap colocalization of markers in BM MSCs (n=7).**

**(a)** Pixel overlap colocalization of 5 markers (ATF6, DAPI, GOLPH4, Nucleolin, TOM20) in BM MSCs per marker for each cell (n=7) plotted as heatmaps. The color bar ranges from 0 (blue) to 0.25 (red) and indicates the fraction of the cell occupied by the marker pair. BM cells 1, 2, and 4 exhibit slightly different organelle patterns than BM cells 3, 5, 6, and 7. DAPI & Nucleolin, ATF6 & TOM20, ATF6 & GOLPH4, and TOM20 & GOLPH4 exhibit the highest pixel overlap colocalizations.

**(b)** Average (top) and standard deviation (bottom) of pixel overlap colocalization per marker across all BM MSCs for 5 markers (ATF6, DAPI, GOLPH4, Nucleolin, TOM20). The color bar ranges from 0 (blue) to 0.25 (red). DAPI & Nucleolin, ATF6 & TOM20, ATF6 & GOLPH4, and TOM20 & GOLPH4 exhibit the highest pixel overlap colocalizations. Standard deviations are mostly low, indicating less single-cell variation.

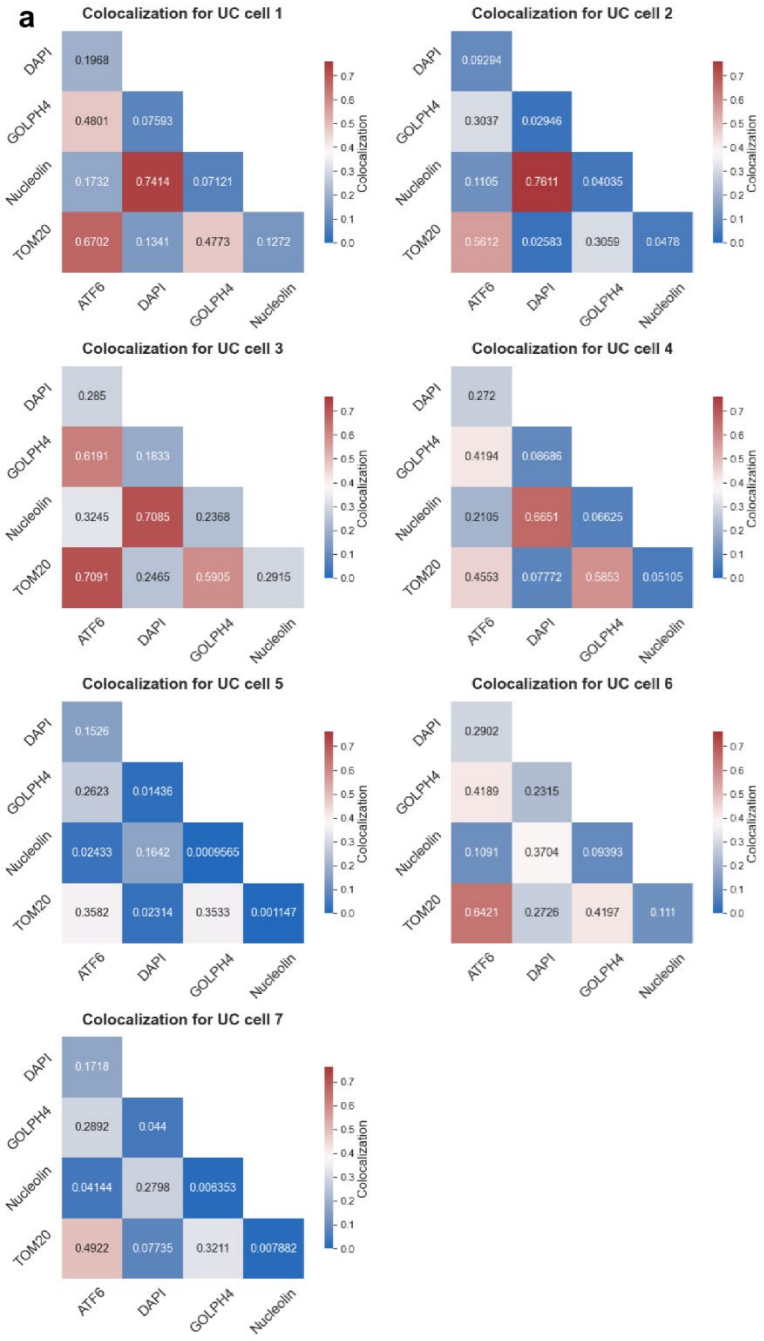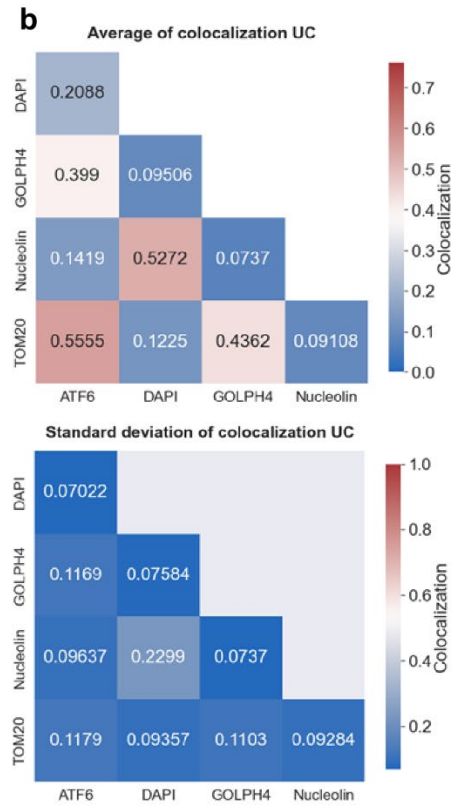

**Supplementary Figure 6. Pixel overlap colocalization of markers in UC MSCs (n=7).**

**(a)** Pixel overlap colocalization of 5 markers (ATF6, DAPI, GOLPH4, Nucleolin, TOM20) in UC MSCs per marker for each cell (n=7) plotted as heatmaps. The color bar ranges from 0 (blue) to 0.76 (red). TOM20 and ATF6 show high colocalization in all cells except UC cells 4 and 5, suggesting crosstalk between mitochondria and ER in most UC MSCs. Nucleolin and DAPI also exhibit high colocalization, indicating some segregation of nuclear and cytosolic organelles.

**(b)** Average (top) and standard deviation (bottom) of pixel overlap colocalization per marker across all BM MSCs for 5 markers (ATF6, DAPI, GOLPH4, Nucleolin, TOM20). The color bar ranges from 0 (blue) to 0.76 (red) for average and 0 (blue) to 1 (red) for standard deviation. The highest average colocalization exists between DAPI & Nucleolin, and ATF6 & TOM20. Thus, many UC MSCs exhibit crosstalk between mitochondria and ER while nuclear organelles are more separated from cytosolic ones. The low standard deviation shows most cells behave similarly.

|                                |                                   |                            |                           |                        |
|--------------------------------|-----------------------------------|----------------------------|---------------------------|------------------------|
| ATF6<br>Concanavalin A<br>DAPI | Beta Tubulin<br>Nucleolin<br>DAPI | GOLPH4<br>Sortilin<br>DAPI | Phalloidin<br>WGA<br>DAPI | TOM20<br>HSP60<br>DAPI |
|--------------------------------|-----------------------------------|----------------------------|---------------------------|------------------------|

UC MSC

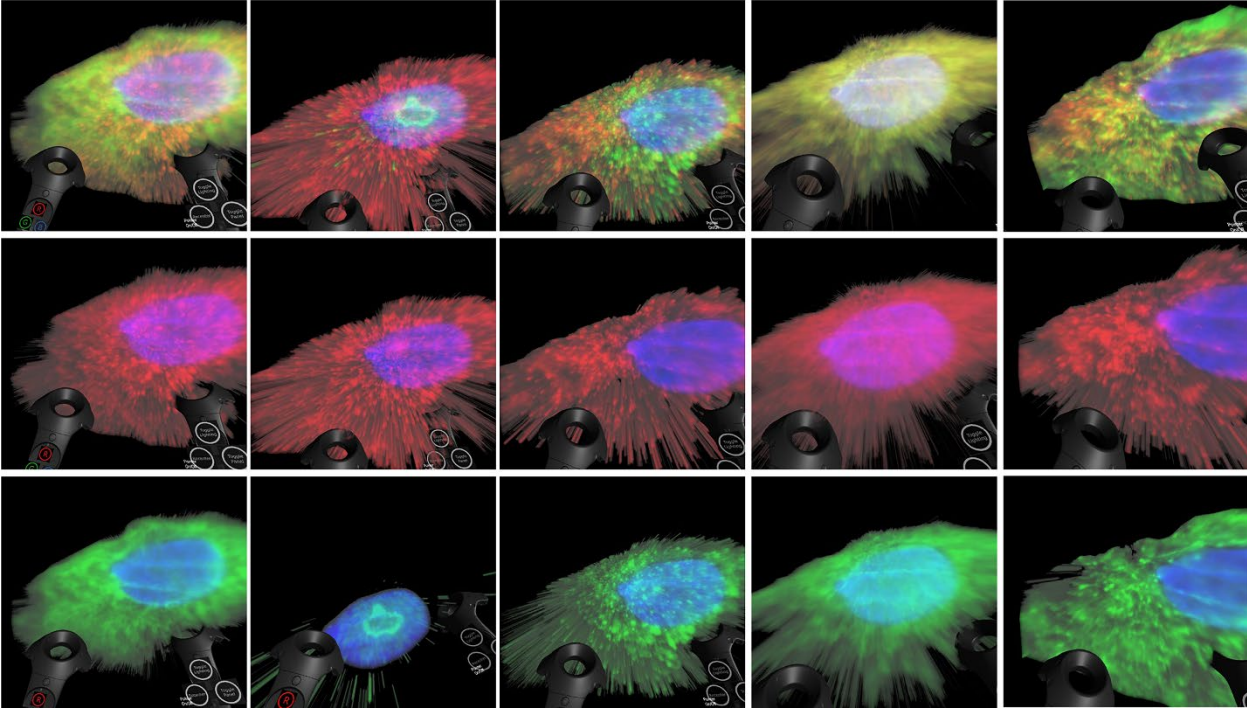



### **Supplementary Figure 7. VR-based visualization of organelle imaging data in MSCs.**

Visualization of organelle protein images (10 markers) for one UC MSC in ConfocalVR. For each cell, the top shows the RGB image of the combined markers, while the bottom two show a single marker image in either red or green with DAPI. Different organelle markers are illustrated across the columns. Merged images are shown in the first row. Column 1: ATF6 (middle row) & Concanavalin A (bottom row), Column 2: Beta Tubulin (middle row) & Nucleolin (bottom row), Column 3: GOLPH4 (middle row) & Sortilin (bottom row), Column 4: Phalloidin (middle row) & WGA (bottom row), Column 5: TOM20 (middle row) & HSP60 (bottom row). Handset toggle switches used to interact with the image are shown on the left and right sides.

**a Indirect Immunofluorescence - HSP60**

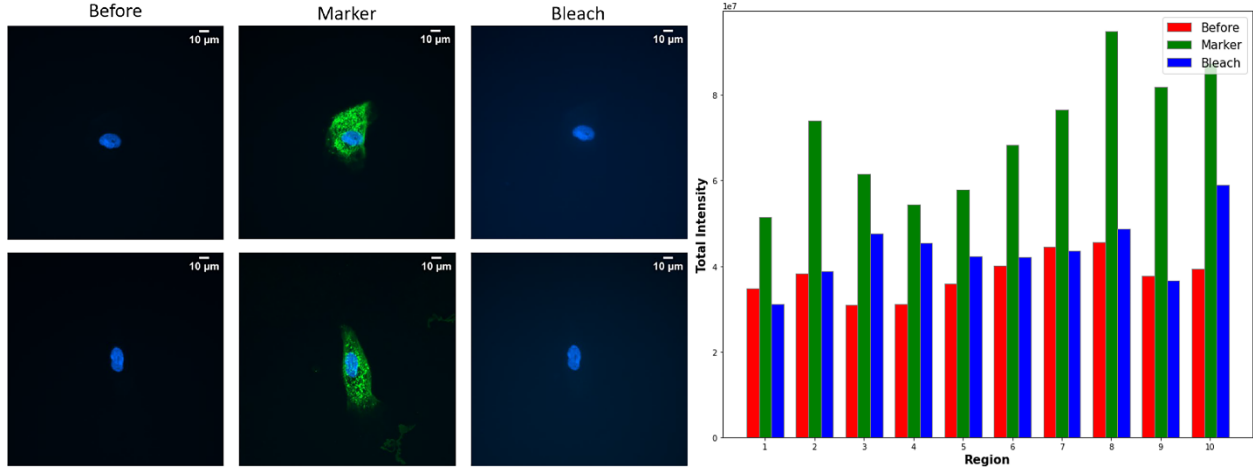

**b Direct Immunofluorescence - HSP60**

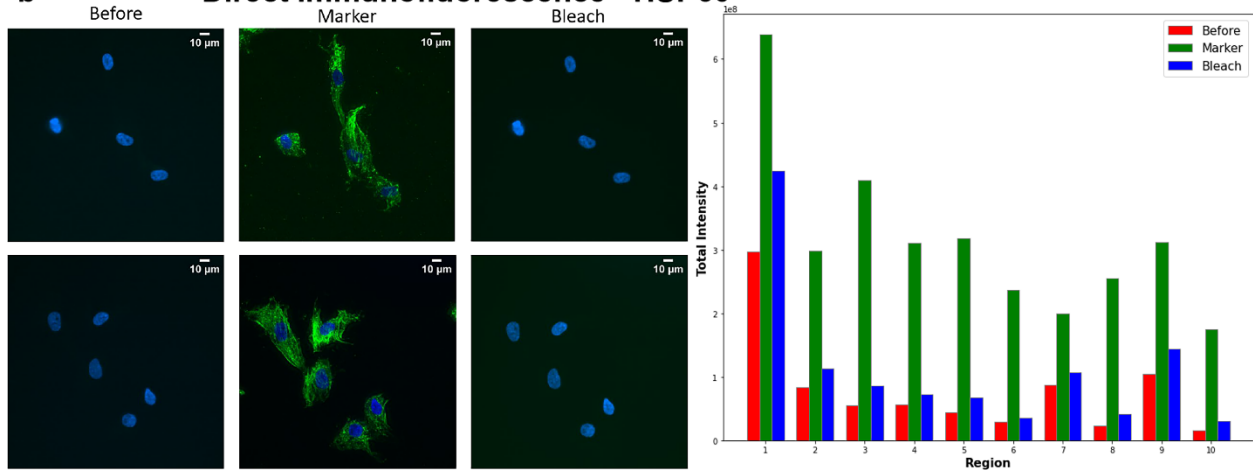

**Supplementary Figure 8. Validation of bleaching protocol for indirect and direct IF with HSP60.**

**(a)** Images of before staining (left column), staining (middle column), and after bleaching (right column) of HSP60 (green) for indirect IF. Before and after bleaching images confirm signal addition and removal before the next staining cycle. All scale bars 10  $\mu\text{m}$ . On the right, the intensity sum of ten regions before staining, staining, and after bleaching is quantified to validate the effect of the fluorophore bleaching process. Before (red) and after bleach (blue) show comparable intensities while marker (green) illustrates approximately 1.5-2-fold higher intensity.

**(b)** Images of before staining (left column), staining (middle column), and after bleaching (right column) of HSP60 (green) for direct IF. Before and after bleaching images confirm signal addition and removal before the next staining cycle. Some green background remains after bleaching but this is uniform outside the cell and is easily removed. All scale bars 10  $\mu\text{m}$ . On the right, the intensity sum of ten regions before staining, staining, and after bleaching is quantified to validate the effect of the fluorophore bleaching process. Before (red) and after bleach (blue) show comparable intensities while marker (green) illustrates approximately 2-fold higher intensity.

**a Segmentation marker - Phalloidin**

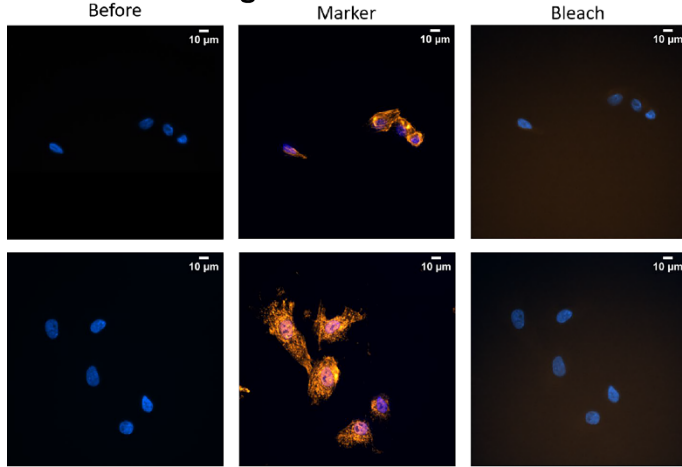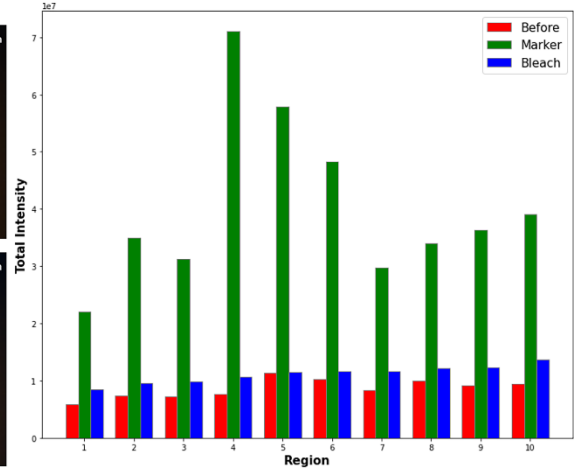

**b Segmentation marker - WGA**

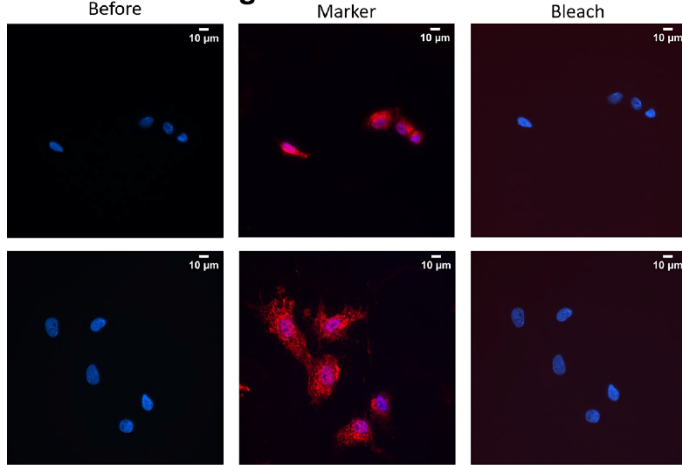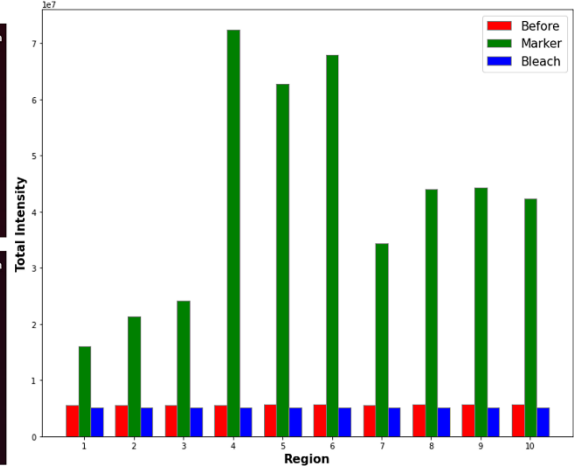

**Supplementary Figure 9. Validation of bleaching protocol for segmentation markers Phalloidin and WGA.**

**(a)** Images of before staining (left column), staining (middle column), and after bleaching (right column) of Phalloidin (yellow). Before and after bleaching images confirm signal addition and removal before the next staining cycle. All scale bars 10  $\mu\text{m}$ . On the right, the intensity sum of ten regions before staining, staining, and after bleaching is quantified to validate the effect of the fluorophore bleaching process. Before (red) and after bleach (blue) show comparable intensities while marker (green) illustrates approximately 2-3-fold higher intensity.

**(b)** Images of before staining (left column), staining (middle column), and after bleaching (right column) of WGA (red). Before and after bleaching images confirm signal addition and removal before the next staining cycle. All scale bars 10  $\mu\text{m}$ . On the right, the intensity sum of ten regions before staining, staining, and after bleaching is quantified to validate the effect of the fluorophore bleaching process. Before (red) and after bleach (blue) show comparable intensities while marker (green) illustrates approximately 2-7-fold higher intensity.

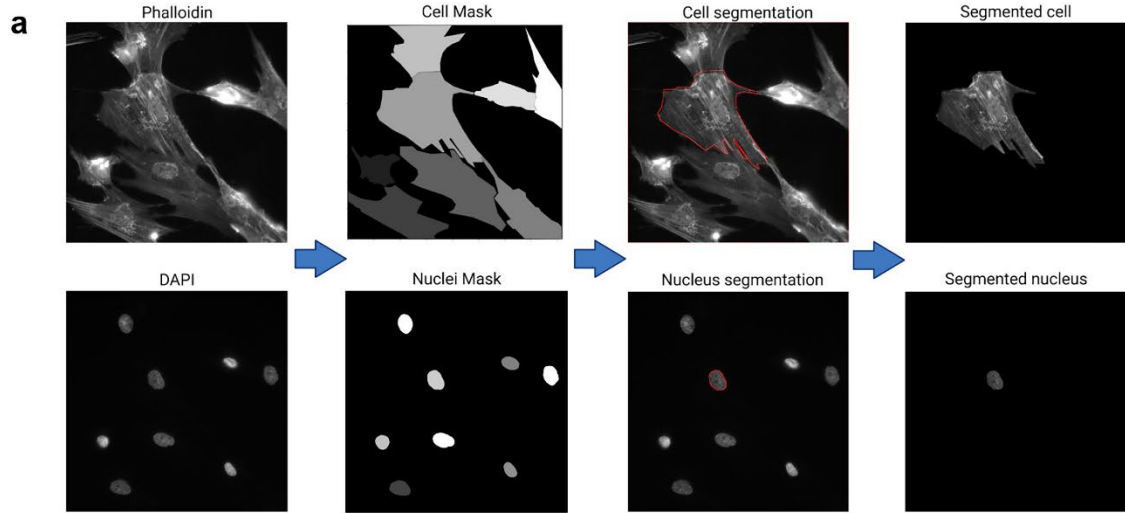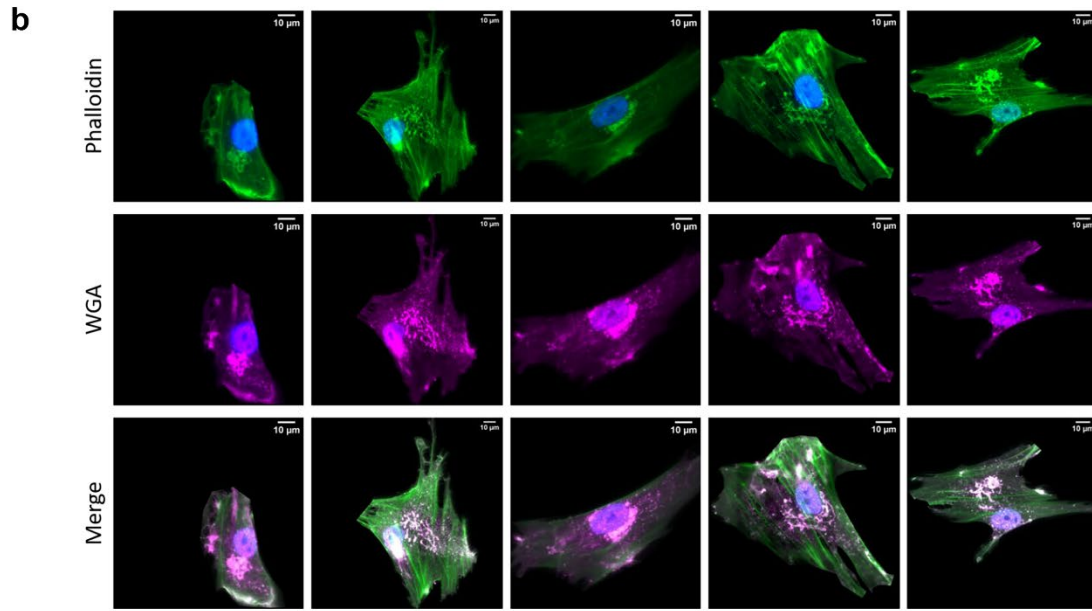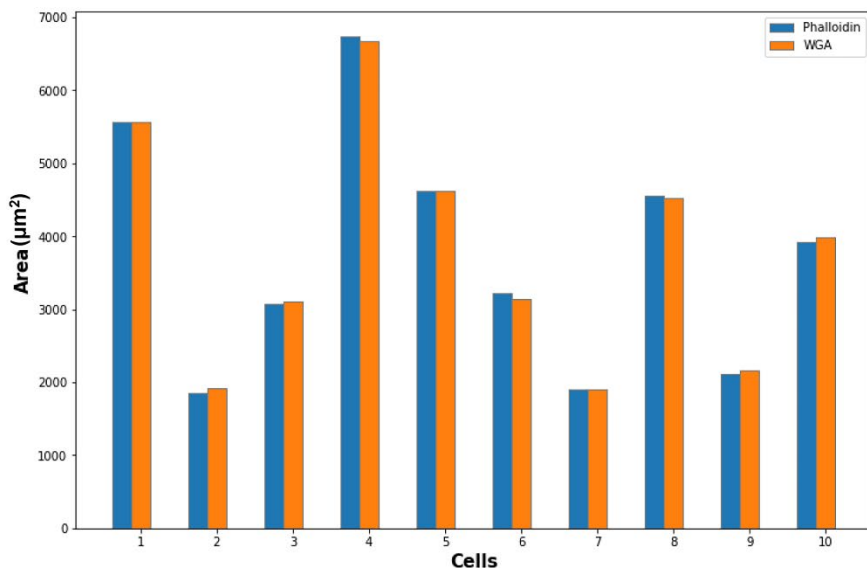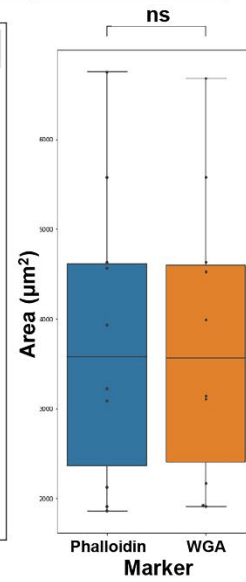



### **Supplementary Figure 10. Segmentation of single cells.**

**(a)** Segmentation of single cells using Phalloidin as the cell mask (top row) and DAPI as the nuclear mask (bottom row). Column 1: raw signal from Phalloidin or DAPI, Column 2: cell or nuclear mask label image from the raw signal, Column 3: cell or nuclear segmentation boundary example from the masks, Column 4: resulting segmented cell and its nucleus.

**(b)** Comparing the area obtained by segmenting single cells (n=10) using two markers - Phalloidin (green, row 1) and WGA (magenta, row 2). The bottom bar graph shows the sum intensities of 10 image regions. The Mann-Whitney test shows no statistical significance between the areas of the two markers ( $p=0.85$ ), indicating that the area distributions are the same for the two markers and either of them can be used for cell segmentation. All scale bars 10  $\mu\text{m}$ .

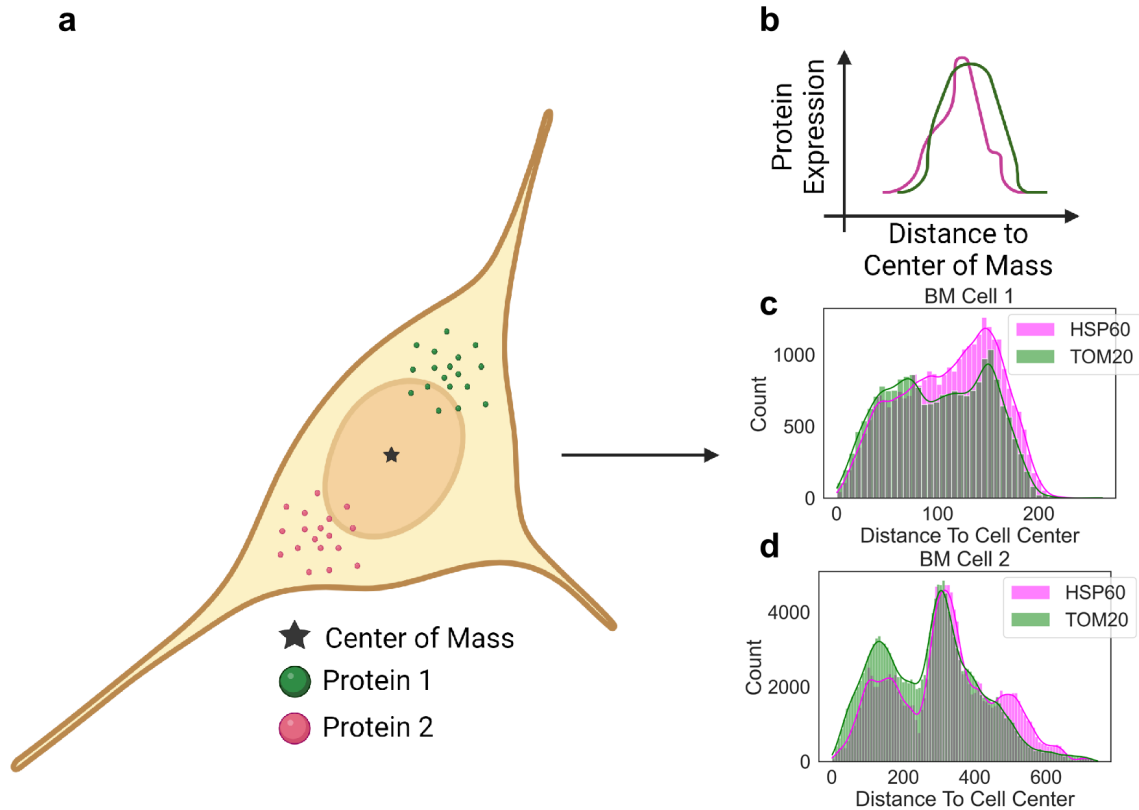

**Supplementary Figure 11. Conversion of 2D spatial coordinates to 1D spatial distributions for KS Hypothesis Testing.**

**(a)** Example illustration of 2D cell focusing on two arbitrary protein markers: green and magenta. The black star denotes the cell's center of mass computed from the cell segmentation mask. Created with BioRender.com.

**(b)** Calculated distances from each protein (green, magenta) pixel to the center of mass resulting in 1D histograms of spatial distances. KS Hypothesis Testing determines if the two signals (green and magenta) come from significantly different underlying distributions. Created with BioRender.com.

**(c)** Example BM cell 1 with significantly ( $p\text{-value} \leq 0.0001$ ) different underlying distributions for the target mitochondria organelle labeled by HSP60 (magenta) and TOM20 (green) protein markers. See **Fig. 4d** for complete cells.

**(d)** Example BM cell 2 with no significant statistical difference in mitochondria spatial expression between HSP60 (magenta) and TOM20 (green) protein markers. See **Fig. 4d** for complete cells.

| <b>Marker</b>     | <b>Target</b>                                                               | <b>Function</b>                                                                                                                                                                                                                                             |
|-------------------|-----------------------------------------------------------------------------|-------------------------------------------------------------------------------------------------------------------------------------------------------------------------------------------------------------------------------------------------------------|
| HSP60             | Mitochondria                                                                | Heat Shock Protein - molecular chaperone; aids protein folding; essential for the protein import into the mitochondrial matrix <sup>1-3</sup>                                                                                                               |
| TOM20             | Mitochondria                                                                | Translocase of the outer membrane of mitochondria; assists the movement of nucleus-encoded precursor proteins <sup>4,5</sup>                                                                                                                                |
| ATF6              | Endoplasmic Reticulum                                                       | Activating transcription factor 6 - Acts during ER stress by activating unfolding protein response (UPR) target genes <sup>6,7</sup>                                                                                                                        |
| GOLPH4/<br>GPP130 | Golgi apparatus                                                             | Golgi integral membrane protein. Plays a role in endosome to Golgi protein trafficking <sup>8,9</sup>                                                                                                                                                       |
| Sortilin          | Localized to membranes of the Golgi, ER, nucleus, endosomes, and lysosomes. | Sorting receptor in the Golgi compartment. Clearance receptor on the cell surface. Regulates intracellular protein transport through secretory or endocytic pathways <sup>10,11</sup>                                                                       |
| Concanavalin A    | Endoplasmic reticulum                                                       | Selectively binds to a-mannopyranosyl and a-glucopyranosyl residues found in the mammalian cell membrane <sup>12,13</sup>                                                                                                                                   |
| Phalloidin        | F-Actin                                                                     | Binds to filamentous actin (F-actin) which takes part in various cellular functions (cell motility, maintenance of cell shape, and regulation of transcription) <sup>13,14</sup>                                                                            |
| WGA               | Golgi apparatus and plasma membrane                                         | Carbohydrate-binding lectin binding to sialic acid and N-acetylglucosamine residues of glycoproteins. Labels the cell membrane of mammalian cells and tissues. Also stains multiple proteins and lipids in the Golgi that are glycosylated <sup>13,15</sup> |
| Nucleolin         | Nucleolus                                                                   | Plays a role in ribosome biogenesis and rRNA synthesis <sup>16</sup>                                                                                                                                                                                        |
| $\beta$ -Tubulin  | Cytosol                                                                     | One of the forms of Tubulin is a cytoskeleton component. Multiple $\beta$ -Tubulin isoforms are expressed in different regions of the cell <sup>17</sup>                                                                                                    |

**Supplementary Table 1.** Description of antibodies used in 10-plex organelle mapping in MSCs.

| Cycle | Channel    | Antibody                             | Dilution                 |
|-------|------------|--------------------------------------|--------------------------|
| 1     | 488<br>647 | DAPI<br>Sortilin<br>$\beta$ -Tubulin | 1:1000<br>1:100<br>1:200 |
| 2     | 555<br>647 | DAPI<br>Phalloidin<br>WGA            | 1:1000<br>1:40<br>1:400  |
| 3     | 647        | DAPI<br>ATF6                         | 1:1000<br>1:200          |
| 4     | 647        | DAPI<br>TOM20                        | 1:1000<br>1:200          |
| 5     | 647        | DAPI<br>GOLPH4                       | 1:1000<br>1:500          |
| 6     | 647        | DAPI<br>HSP60                        | 1:1000<br>1:200          |
| 7     | 647        | DAPI<br>Nucleolin                    | 1:1000<br>1:250          |
| 8     | 488        | DAPI<br>Concanavalin A               | 1:1000<br>1:20           |

**Supplementary Table 2.** Order of antibodies used for rapid multiplexed immunofluorescence of organelle markers in MSCs.

| Markers                               | BM MSC           |              |                  |              | UC MSC           |              |              |              | BM vs UC     |        |
|---------------------------------------|------------------|--------------|------------------|--------------|------------------|--------------|--------------|--------------|--------------|--------|
|                                       | Min              | Mean         | Median           | Max          | Min              | Mean         | Median       | Max          | P_val        | U_stat |
| <b>DAPI_GOLPH4</b>                    | -<br>0.390<br>19 | 0.062<br>123 | 0.074<br>778     | 0.317<br>464 | -<br>0.098<br>86 | 0.105<br>488 | 0.084<br>2   | 0.386<br>037 | 0.576<br>613 | 120    |
| <b>DAPI_HSP60</b>                     | -<br>0.420<br>51 | 0.002<br>756 | -<br>0.010<br>28 | 0.376<br>206 | -<br>0.233<br>94 | 0.022<br>768 | 0.008<br>788 | 0.280<br>216 | 0.806<br>636 | 73     |
| <b>DAPI_Nucleolin</b>                 | 0.543<br>317     | 0.875<br>238 | 0.902<br>931     | 0.975<br>774 | 0.367<br>504     | 0.673<br>049 | 0.699<br>571 | 0.883<br>398 | 3.85E-<br>05 | 322    |
| <b>DAPI_Phalloidin</b>                | 0.216<br>938     | 0.382<br>776 | 0.348<br>025     | 0.619<br>993 | 0.488<br>149     | 0.612<br>673 | 0.625<br>872 | 0.674<br>625 | 0.000<br>594 | 6      |
| <b>DAPI_Sortilin</b>                  | 0.325<br>445     | 0.621<br>453 | 0.654<br>387     | 0.880<br>571 | 0.176<br>85      | 0.426<br>505 | 0.394<br>083 | 0.642<br>554 | 0.003<br>707 | 161    |
| <b>DAPI_TOM20</b>                     | -<br>0.354<br>85 | 0.114<br>69  | 0.074<br>217     | 0.697<br>917 | -<br>0.160<br>03 | 0.098<br>451 | 0.056<br>604 | 0.390<br>662 | 0.797<br>229 | 127    |
| <b>DAPI_WGA</b>                       | 0.347<br>376     | 0.516<br>248 | 0.484<br>481     | 0.720<br>834 | 0.529<br>252     | 0.661<br>049 | 0.687<br>087 | 0.740<br>772 | 0.029<br>309 | 9      |
| <b>Nucleolin_Phalloidin</b>           | 0.194<br>735     | 0.314<br>293 | 0.297<br>51      | 0.590<br>012 | 0.343<br>967     | 0.466<br>714 | 0.449<br>239 | 0.686<br>738 | 0.006<br>085 | 12     |
| <b>Nucleolin_Sortilin</b>             | 0.267<br>203     | 0.629<br>767 | 0.667<br>747     | 0.890<br>442 | 0.002<br>39      | 0.312<br>953 | 0.299<br>362 | 0.608<br>249 | 0.000<br>317 | 188    |
| <b>Nucleolin_TOM20</b>                | -<br>0.345<br>76 | 0.088<br>968 | 0.038<br>012     | 0.680<br>387 | -<br>0.146<br>1  | 0.121<br>276 | 0.096<br>396 | 0.448<br>528 | 0.755<br>208 | 104    |
| <b>Nucleolin_WGA</b>                  | 0.218<br>807     | 0.436<br>256 | 0.407<br>739     | 0.633<br>647 | 0.423<br>519     | 0.497<br>395 | 0.481<br>296 | 0.603<br>469 | 0.316<br>792 | 22     |
| <b>BetaTubulin_Conc<br/>anavalinA</b> | 0.496<br>492     | 0.691<br>746 | 0.740<br>5       | 0.789<br>489 | 0.413<br>759     | 0.573<br>477 | 0.498<br>921 | 0.791<br>367 | 0.412<br>698 | 14     |
| <b>BetaTubulin_DAPI</b>               | -<br>0.311<br>42 | 0.139<br>395 | 0.108<br>773     | 0.625<br>378 | -<br>0.067<br>84 | 0.228<br>074 | 0.261<br>448 | 0.473<br>662 | 0.203<br>879 | 63     |
| <b>BetaTubulin_GOLP<br/>H4</b>        | 0.283<br>838     | 0.574<br>685 | 0.568<br>009     | 0.806<br>661 | 0.137<br>294     | 0.393<br>023 | 0.328<br>376 | 0.714<br>282 | 0.021<br>868 | 124    |
| <b>BetaTubulin_HSP6<br/>0</b>         | 0.327<br>023     | 0.670<br>31  | 0.717<br>532     | 0.865<br>904 | 0.163<br>63      | 0.409<br>397 | 0.410<br>274 | 0.607<br>55  | 0.007<br>184 | 73     |
| <b>BetaTubulin_Nucle<br/>olin</b>     | -<br>0.302<br>3  | 0.112<br>284 | 0.097<br>697     | 0.632<br>351 | -<br>0.055<br>2  | 0.147<br>151 | 0.156<br>322 | 0.377<br>54  | 0.633<br>368 | 75     |
| <b>BetaTubulin_Phall<br/>oidin</b>    | 0.244<br>745     | 0.626<br>865 | 0.672<br>226     | 0.867<br>982 | 0.494<br>649     | 0.582<br>824 | 0.528<br>044 | 0.780<br>561 | 0.720<br>915 | 32     |
| <b>BetaTubulin_Sortil<br/>in</b>      | 0.307<br>572     | 0.597<br>394 | 0.597<br>909     | 0.907<br>544 | 0.124<br>691     | 0.468<br>492 | 0.458<br>365 | 0.752<br>02  | 0.069<br>825 | 83     |

|                                 |                  |              |              |              |              |              |              |              |              |     |
|---------------------------------|------------------|--------------|--------------|--------------|--------------|--------------|--------------|--------------|--------------|-----|
| <b>BetaTubulin_TOM 20</b>       | 0.576<br>419     | 0.772<br>853 | 0.802<br>629 | 0.921<br>24  | 0.113<br>598 | 0.409<br>049 | 0.387<br>87  | 0.678<br>083 | 0.000<br>138 | 124 |
| <b>BetaTubulin_WGA</b>          | 0.428<br>599     | 0.648<br>152 | 0.696<br>771 | 0.853<br>219 | 0.365<br>344 | 0.509<br>655 | 0.521<br>973 | 0.641<br>648 | 0.197<br>059 | 32  |
| <b>Phalloidin_Sortilin</b>      | 0.338<br>837     | 0.538<br>326 | 0.546<br>553 | 0.740<br>659 | 0.547<br>864 | 0.712<br>553 | 0.722<br>694 | 0.860<br>582 | 0.031<br>219 | 10  |
| <b>Phalloidin_TOM20</b>         | 0.100<br>105     | 0.536<br>913 | 0.592<br>766 | 0.793<br>341 | 0.173<br>488 | 0.528<br>836 | 0.564<br>509 | 0.763<br>669 | 0.963<br>585 | 35  |
| <b>Phalloidin_WGA</b>           | 0.511<br>922     | 0.820<br>922 | 0.855<br>109 | 0.963<br>523 | 0.812<br>238 | 0.884<br>41  | 0.919<br>115 | 0.921<br>877 | 0.357<br>895 | 16  |
| <b>ATF6_BetaTubulin</b>         | 0.230<br>635     | 0.638<br>931 | 0.651<br>492 | 0.831<br>835 | 0.111<br>629 | 0.527<br>598 | 0.532<br>653 | 0.833<br>342 | 0.074<br>116 | 101 |
| <b>ATF6_Concanavali nA</b>      | 0.537<br>429     | 0.608<br>85  | 0.606<br>558 | 0.684<br>853 | 0.400<br>188 | 0.691<br>459 | 0.721<br>718 | 0.858<br>331 | 0.460<br>606 | 11  |
| <b>ATF6_DAPI</b>                | -<br>0.376<br>89 | 0.075<br>11  | 0.079<br>387 | 0.479<br>719 | 0.236<br>92  | 0.464<br>934 | 0.469<br>409 | 0.695<br>617 | 9.47E-<br>06 | 12  |
| <b>ATF6_GOLPH4</b>              | 0.438<br>384     | 0.654<br>637 | 0.655<br>356 | 0.871<br>873 | 0.207<br>702 | 0.448<br>072 | 0.412<br>93  | 0.747<br>75  | 0.000<br>512 | 220 |
| <b>ATF6_HSP60</b>               | 0.288<br>369     | 0.595<br>477 | 0.621<br>389 | 0.770<br>715 | 0.343<br>904 | 0.549<br>817 | 0.575<br>758 | 0.741<br>718 | 0.402<br>504 | 87  |
| <b>ATF6_Nucleolin</b>           | -<br>0.378<br>93 | 0.053<br>693 | 0.004<br>319 | 0.469<br>94  | 0.078<br>385 | 0.353<br>06  | 0.327<br>777 | 0.641<br>588 | 0.000<br>504 | 37  |
| <b>ATF6_Phalloidin</b>          | 0.125<br>327     | 0.481<br>911 | 0.549<br>689 | 0.712<br>088 | 0.684<br>505 | 0.792<br>287 | 0.795<br>03  | 0.891<br>105 | 0.000<br>646 | 2   |
| <b>ATF6_Sortilin</b>            | 0.118<br>99      | 0.421<br>913 | 0.408<br>688 | 0.654<br>826 | 0.633<br>488 | 0.766<br>087 | 0.757<br>086 | 0.878<br>789 | 2.62E-<br>05 | 1   |
| <b>ATF6_TOM20</b>               | 0.559<br>568     | 0.652<br>566 | 0.634<br>778 | 0.822<br>792 | 0.311<br>763 | 0.584<br>473 | 0.565<br>917 | 0.810<br>053 | 0.117<br>297 | 132 |
| <b>ATF6_WGA</b>                 | 0.252<br>876     | 0.473<br>902 | 0.383<br>127 | 0.730<br>323 | 0.699<br>616 | 0.753<br>623 | 0.725<br>782 | 0.863<br>312 | 0.010<br>256 | 3   |
| <b>ConcanavalinA_DAPI</b>       | -<br>0.054<br>48 | 0.303<br>461 | 0.362<br>518 | 0.543<br>288 | 0.000<br>862 | 0.222<br>493 | 0.181<br>937 | 0.550<br>333 | 0.604<br>196 | 22  |
| <b>ConcanavalinA_GOLPH4</b>     | 0.464<br>922     | 0.570<br>05  | 0.532<br>831 | 0.749<br>616 | 0.544<br>043 | 0.689<br>883 | 0.696<br>733 | 0.816<br>394 | 0.198<br>601 | 9   |
| <b>ConcanavalinA_HSP60</b>      | 0.485<br>728     | 0.610<br>834 | 0.568<br>922 | 0.819<br>765 | 0.588<br>811 | 0.688<br>966 | 0.684<br>291 | 0.785<br>184 | 0.367<br>677 | 10  |
| <b>ConcanavalinA_Nucleolin</b>  | -<br>0.033<br>87 | 0.299<br>571 | 0.335<br>504 | 0.561<br>149 | 0.011<br>404 | 0.216<br>478 | 0.205<br>355 | 0.577<br>092 | 0.682<br>828 | 19  |
| <b>ConcanavalinA_Phalloidin</b> | 0.309<br>975     | 0.533<br>999 | 0.533<br>309 | 0.759<br>403 | 0.477<br>81  | 0.732<br>062 | 0.744<br>397 | 0.911<br>059 | 0.171<br>429 | 5   |
| <b>ConcanavalinA_Sortilin</b>   | 0.610<br>423     | 0.641<br>146 | 0.643<br>976 | 0.666<br>209 | 0.356<br>439 | 0.604<br>905 | 0.620<br>96  | 0.864<br>761 | 1            | 16  |



|                                 |                  |                   |                   |                   |                  |                   |                   |                   |                   |     |
|---------------------------------|------------------|-------------------|-------------------|-------------------|------------------|-------------------|-------------------|-------------------|-------------------|-----|
| <b>ConcanavalinA_TO<br/>M20</b> | 0.569<br>595     | 0.643<br>55       | 0.611<br>876      | 0.780<br>851      | 0.560<br>793     | 0.719<br>975      | 0.720<br>785      | 0.823<br>378      | 0.282<br>828      | 9   |
| <b>ConcanavalinA_W<br/>GA</b>   | 0.433<br>955     | 0.621<br>926      | 0.607<br>835      | 0.838<br>08       | 0.546<br>859     | 0.660<br>384      | 0.609<br>458      | 0.824<br>837      | 1                 | 6   |
| <b>GOLPH4_HSP60</b>             | 0.385<br>765     | 0.601<br>535      | 0.651<br>802      | 0.790<br>159      | 0.341<br>387     | 0.558<br>922      | 0.574<br>245      | 0.731<br>19       | 0.370<br>844      | 88  |
| <b>GOLPH4_Nucleolin</b>         | -<br>0.387<br>9  | -<br>0.044<br>443 | -<br>0.036<br>952 | -<br>0.267<br>336 | -<br>0.102<br>64 | -<br>0.097<br>832 | -<br>0.054<br>791 | -<br>0.413<br>396 | -<br>0.552<br>27  | 119 |
| <b>GOLPH4_Phalloidin</b>        | 0.087<br>83      | 0.479<br>072      | 0.525<br>426      | 0.731<br>147      | 0.224<br>822     | 0.513<br>823      | 0.533<br>916      | 0.759<br>271      | 0.820<br>082      | 33  |
| <b>GOLPH4_Sortilin</b>          | 0.043<br>945     | 0.366<br>134      | 0.370<br>333      | 0.680<br>59       | 0.199<br>859     | 0.388<br>441      | 0.352<br>215      | 0.682<br>184      | 0.979<br>483      | 83  |
| <b>GOLPH4_TOM20</b>             | 0.306<br>794     | 0.599<br>249      | 0.593<br>468      | 0.803<br>896      | 0.390<br>917     | 0.570<br>744      | 0.586<br>689      | 0.722<br>106      | 0.555<br>735      | 119 |
| <b>GOLPH4_WGA</b>               | 0.152<br>016     | 0.455<br>3        | 0.496<br>72       | 0.727<br>791      | 0.330<br>933     | 0.434<br>106      | 0.403<br>628      | 0.598<br>236      | 0.870<br>588      | 28  |
| <b>HSP60_Nucleolin</b>          | -<br>0.413<br>67 | -<br>0.029<br>45  | -<br>0.073<br>52  | -<br>0.334<br>086 | -<br>0.183<br>66 | -<br>0.048<br>875 | -<br>0.004<br>55  | -<br>0.332<br>282 | -<br>0.417<br>302 | 57  |
| <b>HSP60_Phalloidin</b>         | 0.265<br>471     | 0.523<br>268      | 0.450<br>504      | 0.773<br>128      | 0.286<br>359     | 0.500<br>554      | 0.541<br>214      | 0.683<br>799      | 0.949<br>717      | 25  |
| <b>HSP60_Sortilin</b>           | 0.152<br>477     | 0.525<br>96       | 0.540<br>497      | 0.753<br>786      | 0.237<br>453     | 0.494<br>478      | 0.487<br>629      | 0.694<br>411      | 0.599<br>361      | 69  |
| <b>HSP60_TOM20</b>              | 0.575<br>209     | 0.705<br>255      | 0.718<br>745      | 0.827<br>389      | 0.553<br>234     | 0.681<br>668      | 0.680<br>737      | 0.797<br>218      | 0.602<br>068      | 81  |
| <b>HSP60_WGA</b>                | 0.313<br>627     | 0.527<br>848      | 0.486<br>146      | 0.795<br>322      | 0.262<br>485     | 0.404<br>339      | 0.323<br>262      | 0.627<br>269      | 0.278<br>788      | 18  |
| <b>Sortilin_TOM20</b>           | 0.223<br>946     | 0.542<br>002      | 0.525<br>151      | 0.889<br>835      | 0.223<br>506     | 0.492<br>665      | 0.467<br>866      | 0.728<br>453      | 0.558<br>76       | 76  |
| <b>Sortilin_WGA</b>             | 0.514<br>945     | 0.656<br>143      | 0.663<br>811      | 0.809<br>66       | 0.571<br>951     | 0.666<br>756      | 0.636<br>943      | 0.791<br>373      | 1                 | 16  |
| <b>TOM20_WGA</b>                | 0.305<br>27      | 0.557<br>022      | 0.545<br>052      | 0.809<br>731      | 0.298<br>807     | 0.458<br>673      | 0.405<br>488      | 0.724<br>908      | 0.379<br>121      | 32  |

**Supplementary Table 3.** Minimum, mean, median, and maximum of Pearson's correlation for all marker pairs for BM and UC MSCs, with the p-value obtained from the Mann-Whitney test (corresponding to Figure 3A).

| Markers                               | BM MSC       |              |              |              | UC MSC       |              |              |              | BM vs UC     |        |
|---------------------------------------|--------------|--------------|--------------|--------------|--------------|--------------|--------------|--------------|--------------|--------|
|                                       | Min          | Mean         | Median       | Max          | Min          | Mean         | Median       | Max          | P_val        | U_stat |
| <b>DAPI_GOLPH4</b>                    | 0.029<br>933 | 0.140<br>341 | 0.110<br>874 | 0.612<br>356 | 0.038<br>534 | 0.205<br>634 | 0.129<br>603 | 0.546<br>821 | 0.339<br>79  | 109    |
| <b>DAPI_HSP60</b>                     | 0.032<br>031 | 0.107<br>235 | 0.104<br>096 | 0.206<br>923 | 0.025<br>207 | 0.202<br>978 | 0.128<br>565 | 0.508<br>919 | 0.567<br>915 | 67     |
| <b>DAPI_Nucleolin</b>                 | 0.095<br>349 | 0.217<br>035 | 0.172<br>187 | 0.701<br>208 | 0.089<br>205 | 0.238<br>682 | 0.197<br>883 | 0.533<br>68  | 0.501<br>915 | 157    |
| <b>DAPI_Phalloidin</b>                | 0.068<br>819 | 0.205<br>241 | 0.150<br>994 | 0.686<br>085 | 0.195<br>755 | 0.349<br>284 | 0.328<br>462 | 0.522<br>633 | 0.012<br>561 | 16     |
| <b>DAPI_Sortilin</b>                  | 0.080<br>312 | 0.189<br>254 | 0.154<br>17  | 0.688<br>467 | 0.077<br>63  | 0.228<br>077 | 0.179<br>385 | 0.494<br>266 | 0.461<br>095 | 81     |
| <b>DAPI_TOM20</b>                     | 0.031<br>419 | 0.161<br>131 | 0.127<br>88  | 0.680<br>571 | 0.047<br>601 | 0.218<br>104 | 0.148<br>579 | 0.544<br>187 | 0.593<br>595 | 106    |
| <b>DAPI_WGA</b>                       | 0.082<br>669 | 0.221<br>316 | 0.170<br>709 | 0.686<br>617 | 0.201<br>016 | 0.301<br>321 | 0.277<br>963 | 0.448<br>344 | 0.049<br>948 | 11     |
| <b>Nucleolin_Phalloidin</b>           | 0.081<br>18  | 0.237<br>942 | 0.184<br>388 | 0.721<br>285 | 0.183<br>496 | 0.339<br>912 | 0.324<br>401 | 0.511<br>36  | 0.177<br>503 | 29     |
| <b>Nucleolin_Sortilin</b>             | 0.100<br>414 | 0.223<br>85  | 0.190<br>346 | 0.720<br>713 | 0.074<br>958 | 0.224<br>461 | 0.170<br>72  | 0.480<br>421 | 0.526<br>843 | 120    |
| <b>Nucleolin_TOM20</b>                | 0.050<br>427 | 0.186<br>549 | 0.159<br>006 | 0.701<br>684 | 0.067<br>648 | 0.220<br>288 | 0.143<br>254 | 0.538<br>955 | 0.983<br>417 | 111    |
| <b>Nucleolin_WGA</b>                  | 0.102<br>003 | 0.255<br>952 | 0.198<br>87  | 0.721<br>176 | 0.186<br>831 | 0.291<br>371 | 0.257<br>728 | 0.463<br>197 | 0.361<br>571 | 23     |
| <b>BetaTubulin_Conc<br/>anavalinA</b> | 0.162<br>41  | 0.184<br>45  | 0.171<br>137 | 0.233<br>117 | 0.095<br>782 | 0.189<br>548 | 0.108<br>706 | 0.522<br>169 | 0.190<br>476 | 16     |
| <b>BetaTubulin_DAPI</b>               | 0.038<br>165 | 0.180<br>007 | 0.122<br>648 | 0.686<br>98  | 0.041<br>233 | 0.153<br>385 | 0.108<br>799 | 0.491<br>91  | 0.548<br>953 | 103    |
| <b>BetaTubulin_GOL<br/>PH4</b>        | 0.085<br>206 | 0.198<br>218 | 0.176<br>466 | 0.636<br>7   | 0.053<br>937 | 0.149<br>621 | 0.096<br>58  | 0.509<br>404 | 0.042<br>445 | 119    |
| <b>BetaTubulin_HSP<br/>60</b>         | 0.120<br>676 | 0.181<br>837 | 0.167<br>848 | 0.294<br>287 | 0.056<br>42  | 0.148<br>507 | 0.102<br>22  | 0.492<br>257 | 0.012<br>979 | 71     |
| <b>BetaTubulin_Nucl<br/>eolin</b>     | 0.063<br>182 | 0.223<br>111 | 0.169<br>347 | 0.723<br>95  | 0.038<br>043 | 0.149<br>407 | 0.103<br>773 | 0.487<br>062 | 0.125<br>672 | 116    |
| <b>BetaTubulin_Phall<br/>oidin</b>    | 0.052<br>337 | 0.236<br>681 | 0.156<br>967 | 0.728<br>057 | 0.107<br>428 | 0.215<br>013 | 0.123<br>001 | 0.506<br>623 | 0.277<br>124 | 39     |

|                             |              |              |              |              |              |              |              |              |              |     |
|-----------------------------|--------------|--------------|--------------|--------------|--------------|--------------|--------------|--------------|--------------|-----|
| <b>BetaTubulin_Sortilin</b> | 0.118<br>466 | 0.241<br>298 | 0.204<br>575 | 0.732<br>019 | 0.050<br>634 | 0.152<br>346 | 0.114<br>866 | 0.527<br>398 | 0.003<br>803 | 97  |
| <b>BetaTubulin_TOM20</b>    | 0.136<br>339 | 0.232<br>811 | 0.193<br>219 | 0.695<br>106 | 0.054<br>592 | 0.154<br>842 | 0.099<br>75  | 0.473<br>625 | 0.021<br>489 | 100 |
| <b>BetaTubulin_WGA</b>      | 0.094<br>124 | 0.265<br>419 | 0.191<br>987 | 0.728<br>109 | 0.101<br>372 | 0.180<br>874 | 0.119<br>545 | 0.321<br>705 | 0.432<br>353 | 28  |
| <b>Phalloidin_Sortilin</b>  | 0.077<br>295 | 0.224<br>957 | 0.171<br>793 | 0.731<br>656 | 0.173<br>095 | 0.331<br>82  | 0.325<br>545 | 0.496<br>152 | 0.093<br>407 | 14  |
| <b>Phalloidin_TOM20</b>     | 0.059<br>375 | 0.200<br>287 | 0.155<br>203 | 0.696<br>15  | 0.101<br>767 | 0.316<br>583 | 0.325<br>452 | 0.520<br>102 | 0.493<br>644 | 28  |
| <b>Phalloidin_WGA</b>       | 0.127<br>441 | 0.294<br>336 | 0.231<br>962 | 0.782<br>358 | 0.231<br>311 | 0.328<br>896 | 0.235<br>917 | 0.519<br>462 | 0.545<br>614 | 19  |
| <b>ATF6_BetaTubulin</b>     | 0.077<br>13  | 0.206<br>393 | 0.177<br>691 | 0.663<br>276 | 0.049<br>964 | 0.172<br>42  | 0.117<br>646 | 0.535<br>966 | 0.095<br>159 | 99  |
| <b>ATF6_ConcanavalinA</b>   | 0.140<br>418 | 0.164<br>71  | 0.159<br>82  | 0.198<br>783 | 0.136<br>196 | 0.299<br>043 | 0.213<br>225 | 0.551<br>848 | 0.460<br>606 | 11  |
| <b>ATF6_DAPI</b>            | 0.039<br>889 | 0.145<br>055 | 0.111<br>989 | 0.616<br>466 | 0.078<br>378 | 0.243<br>452 | 0.195<br>032 | 0.524<br>616 | 0.008<br>761 | 62  |
| <b>ATF6_GOLPH4</b>          | 0.108<br>655 | 0.196<br>016 | 0.170<br>058 | 0.637<br>351 | 0.072<br>018 | 0.213<br>853 | 0.135<br>709 | 0.529<br>135 | 0.406<br>098 | 150 |
| <b>ATF6_HSP60</b>           | 0.104<br>016 | 0.164<br>404 | 0.157<br>385 | 0.291<br>08  | 0.066<br>96  | 0.235<br>376 | 0.151<br>047 | 0.510<br>431 | 0.885<br>234 | 69  |
| <b>ATF6_Nucleolin</b>       | 0.046<br>195 | 0.170<br>277 | 0.146<br>255 | 0.637<br>667 | 0.085<br>12  | 0.235<br>627 | 0.192<br>502 | 0.515<br>698 | 0.077<br>286 | 84  |
| <b>ATF6_Phalloidin</b>      | 0.050<br>772 | 0.186<br>974 | 0.142<br>172 | 0.648<br>206 | 0.191<br>566 | 0.349<br>565 | 0.341<br>216 | 0.535<br>523 | 0.027<br>311 | 11  |
| <b>ATF6_Sortilin</b>        | 0.084<br>176 | 0.161<br>247 | 0.151<br>105 | 0.290<br>217 | 0.103<br>548 | 0.257<br>465 | 0.202<br>064 | 0.510<br>202 | 0.069<br>294 | 47  |
| <b>ATF6_TOM20</b>           | 0.110<br>376 | 0.173<br>772 | 0.169<br>589 | 0.293<br>165 | 0.091<br>216 | 0.250<br>017 | 0.181<br>488 | 0.514<br>897 | 0.890<br>085 | 94  |
| <b>ATF6_WGA</b>             | 0.084<br>178 | 0.208<br>003 | 0.157<br>136 | 0.643<br>11  | 0.197<br>514 | 0.312        | 0.272<br>604 | 0.505<br>28  | 0.077<br>656 | 8   |
| <b>ConcanavalinA_DAPI</b>   | 0.068<br>039 | 0.134<br>797 | 0.148<br>54  | 0.174<br>069 | 0.010<br>144 | 0.250<br>507 | 0.153<br>23  | 0.526<br>69  | 0.710<br>49  | 15  |
| <b>ConcanavalinA_GOLPH4</b> | 0.116<br>307 | 0.158<br>268 | 0.166<br>661 | 0.183<br>443 | 0.098<br>642 | 0.283<br>18  | 0.190<br>439 | 0.537<br>021 | 0.260<br>14  | 10  |
| <b>ConcanavalinA_HSP60</b>  | 0.128<br>374 | 0.179<br>046 | 0.182<br>393 | 0.223<br>023 | 0.112<br>997 | 0.285<br>997 | 0.195<br>008 | 0.540<br>085 | 0.682<br>828 | 13  |

|                                 |              |              |              |              |              |              |              |              |              |     |
|---------------------------------|--------------|--------------|--------------|--------------|--------------|--------------|--------------|--------------|--------------|-----|
| <b>ConcanavalinA_Nucleolin</b>  | 0.086<br>394 | 0.151<br>197 | 0.166<br>215 | 0.185<br>966 | 0.126<br>744 | 0.286<br>909 | 0.195<br>202 | 0.523<br>105 | 0.460<br>606 | 11  |
| <b>ConcanavalinA_Phalloidin</b> | 0.056<br>748 | 0.138<br>347 | 0.155<br>869 | 0.184<br>902 | 0.150<br>698 | 0.347<br>229 | 0.338<br>82  | 0.553<br>11  | 0.171<br>429 | 5   |
| <b>ConcanavalinA_Sortilin</b>   | 0.138<br>492 | 0.195<br>578 | 0.199<br>164 | 0.245<br>491 | 0.130<br>307 | 0.277<br>163 | 0.178<br>028 | 0.496<br>645 | 1            | 16  |
| <b>ConcanavalinA_TOM20</b>      | 0.137<br>467 | 0.175<br>938 | 0.182<br>917 | 0.200<br>449 | 0.123<br>607 | 0.300<br>654 | 0.205<br>623 | 0.533<br>969 | 0.569<br>697 | 12  |
| <b>ConcanavalinA_WGA</b>        | 0.092<br>071 | 0.174<br>946 | 0.200<br>21  | 0.207<br>293 | 0.145<br>763 | 0.286<br>049 | 0.198<br>647 | 0.513<br>738 | 1            | 6   |
| <b>GOLPH4_HSP60</b>             | 0.099<br>651 | 0.159<br>818 | 0.163<br>529 | 0.233<br>27  | 0.068<br>394 | 0.241<br>964 | 0.129<br>313 | 0.522<br>892 | 0.750<br>832 | 78  |
| <b>GOLPH4_Nucleolin</b>         | 0.038<br>254 | 0.166<br>481 | 0.140<br>757 | 0.627<br>265 | 0.057<br>044 | 0.207<br>773 | 0.137<br>589 | 0.536<br>126 | 0.842<br>951 | 130 |
| <b>GOLPH4_Phalloidin</b>        | 0.049<br>873 | 0.183<br>734 | 0.145<br>713 | 0.638<br>622 | 0.111<br>599 | 0.314<br>45  | 0.307<br>422 | 0.520<br>862 | 0.437<br>083 | 27  |
| <b>GOLPH4_Sortilin</b>          | 0.073<br>334 | 0.153<br>295 | 0.142<br>385 | 0.265<br>553 | 0.070<br>501 | 0.208<br>047 | 0.117<br>78  | 0.496<br>356 | 0.625<br>106 | 94  |
| <b>GOLPH4_TOM20</b>             | 0.099<br>973 | 0.165<br>855 | 0.170<br>396 | 0.238<br>14  | 0.073<br>102 | 0.241<br>21  | 0.171<br>869 | 0.555<br>621 | 0.878<br>593 | 101 |
| <b>GOLPH4_WGA</b>               | 0.068<br>093 | 0.204<br>101 | 0.163<br>804 | 0.634<br>983 | 0.107<br>153 | 0.268<br>693 | 0.245<br>805 | 0.476<br>008 | 0.548<br>739 | 20  |
| <b>HSP60_Nucleolin</b>          | 0.045<br>298 | 0.130<br>364 | 0.128<br>896 | 0.273<br>187 | 0.049<br>015 | 0.198<br>623 | 0.106<br>824 | 0.506<br>065 | 0.862<br>015 | 75  |
| <b>HSP60_Phalloidin</b>         | 0.061<br>138 | 0.152<br>704 | 0.150<br>24  | 0.259<br>035 | 0.102<br>167 | 0.310<br>5   | 0.298<br>625 | 0.524<br>778 | 0.344<br>988 | 16  |
| <b>HSP60_Sortilin</b>           | 0.104<br>884 | 0.179<br>364 | 0.159<br>302 | 0.304<br>518 | 0.063<br>344 | 0.234<br>236 | 0.140<br>627 | 0.505<br>232 | 0.511<br>406 | 71  |
| <b>HSP60_TOM20</b>              | 0.116<br>491 | 0.179<br>458 | 0.174<br>055 | 0.292<br>918 | 0.081<br>971 | 0.242<br>916 | 0.165<br>204 | 0.517<br>226 | 0.862<br>015 | 75  |
| <b>HSP60_WGA</b>                | 0.083<br>358 | 0.169<br>871 | 0.165<br>588 | 0.276<br>312 | 0.098<br>521 | 0.240<br>743 | 0.170<br>423 | 0.453<br>287 | 0.921<br>212 | 11  |
| <b>Sortilin_TOM20</b>           | 0.104<br>367 | 0.224<br>192 | 0.186<br>117 | 0.694<br>328 | 0.085<br>092 | 0.235<br>964 | 0.152<br>351 | 0.491<br>404 | 0.600<br>878 | 75  |
| <b>Sortilin_WGA</b>             | 0.116<br>207 | 0.255<br>394 | 0.212<br>912 | 0.734<br>139 | 0.175<br>377 | 0.278<br>567 | 0.188<br>996 | 0.471<br>329 | 0.884<br>615 | 18  |
| <b>TOM20_WGA</b>                | 0.093<br>864 | 0.220<br>697 | 0.176<br>838 | 0.696<br>823 | 0.097<br>84  | 0.287<br>557 | 0.272<br>48  | 0.507<br>427 | 0.446<br>154 | 17  |

**Supplementary Table 4.** Minimum, mean, median, and maximum colocalization for all marker pairs for BM and UC MSCs, with the p-value obtained from the Mann-Whitney test (corresponding to Figure 3B).

| Marker        | BM MSC |          |          |        | UC MSC |          |          |        | BM vs UC |        |
|---------------|--------|----------|----------|--------|--------|----------|----------|--------|----------|--------|
|               | Min    | Mean     | Median   | Max    | Min    | Mean     | Median   | Max    | P_val    | U_stat |
| ATF6          | 95613  | 251152.3 | 182058   | 540950 | 74862  | 354998.1 | 297711   | 919540 | 0.071296 | 90     |
| BetaTubulin   | 95613  | 246384.8 | 187415   | 540950 | 192623 | 318666.6 | 272743   | 603029 | 0.08532  | 57     |
| ConcanavalinA | 125253 | 283039.8 | 258858.5 | 489189 | 62483  | 252557.1 | 248294   | 470513 | 0.825175 | 20     |
| DAPI          | 95613  | 272233.7 | 248057   | 540950 | 62483  | 360352   | 297891   | 919540 | 0.114574 | 149    |
| GOLPH4        | 95613  | 243617.6 | 182058   | 540950 | 62483  | 321317.4 | 272743   | 919540 | 0.170779 | 111    |
| HSP60         | 95613  | 249348.2 | 184736.5 | 540950 | 62483  | 297553.1 | 293154.5 | 603029 | 0.425315 | 68     |
| Nucleolin     | 95613  | 267434.1 | 236405   | 540950 | 74862  | 360970.9 | 297891   | 919540 | 0.096196 | 138    |
| Phalloidin    | 95613  | 278803.2 | 274030   | 489189 | 117910 | 294907.7 | 293154.5 | 470513 | 0.922539 | 52     |
| Sortilin      | 95613  | 258700.6 | 215057.5 | 540950 | 117910 | 362750.6 | 297711   | 919540 | 0.101707 | 67     |
| TOM20         | 95613  | 235855.4 | 187415   | 489189 | 62483  | 309172.9 | 288598   | 603029 | 0.174001 | 91     |
| WGA           | 95613  | 268758.1 | 248110   | 489189 | 192623 | 319911.5 | 308255   | 470513 | 0.484484 | 27     |

**Supplementary Table 5.** Minimum, mean, median, and maximum area for all markers for BM and UC MSCs, with the p-value obtained from the Mann-Whitney test (corresponding to Figure 3C).

| Marker        | BM MSC   |          |          |          | UC MSC  |          |          |          | BM vs UC |        |
|---------------|----------|----------|----------|----------|---------|----------|----------|----------|----------|--------|
|               | Min      | Mean     | Median   | Max      | Min     | Mean     | Median   | Max      | P_val    | U_stat |
| ATF6          | 33.17142 | 98.03184 | 100.1086 | 145.7242 | 40.8177 | 91.76635 | 81.2978  | 185.1369 | 0.071296 | 90     |
| BetaTubulin   | 31.58946 | 91.9572  | 94.03891 | 145.7242 | 40.8177 | 104.4021 | 93.14664 | 185.1369 | 0.08532  | 57     |
| ConcanavalinA | 86.07068 | 98.85573 | 95.53423 | 118.2838 | 40.8177 | 78.65693 | 81.2978  | 127.5041 | 0.825175 | 20     |
| DAPI          | 31.58946 | 92.09201 | 94.03891 | 145.7242 | 40.8177 | 94.06361 | 84.7404  | 185.1369 | 0.114574 | 149    |
| GOLPH4        | 33.17142 | 95.59522 | 94.61209 | 145.7242 | 40.8177 | 92.95852 | 84.7404  | 185.1369 | 0.170779 | 111    |
| HSP60         | 71.59402 | 103.3321 | 103.6725 | 145.7242 | 40.8177 | 97.97317 | 103.5249 | 177.7374 | 0.425315 | 68     |
| Nucleolin     | 31.58946 | 89.83544 | 90.75636 | 145.7242 | 40.8177 | 93.85647 | 84.7404  | 185.1369 | 0.096196 | 138    |
| Phalloidin    | 31.58946 | 82.7879  | 88.31179 | 118.2838 | 40.8177 | 65.02848 | 60.97885 | 98.11028 | 0.922539 | 52     |



|                 |              |              |              |              |              |              |              |              |              |    |
|-----------------|--------------|--------------|--------------|--------------|--------------|--------------|--------------|--------------|--------------|----|
| <b>Sortilin</b> | 31.58<br>946 | 94.824<br>2  | 95.054<br>21 | 145.724<br>2 | 40.81<br>77  | 94.894<br>08 | 88.183       | 185.13<br>69 | 0.1017<br>07 | 67 |
| <b>TOM20</b>    | 31.58<br>946 | 96.153<br>09 | 94.612<br>09 | 145.724<br>2 | 40.81<br>77  | 95.460<br>01 | 88.183       | 185.13<br>69 | 0.1740<br>01 | 91 |
| <b>WGA</b>      | 31.58<br>946 | 81.123<br>97 | 85.344<br>37 | 118.283<br>8 | 42.43<br>858 | 69.562<br>05 | 68.849<br>67 | 98.110<br>28 | 0.4844<br>84 | 27 |

**Supplementary Table 6.** Minimum, mean, median, and maximum intensity for all markers for BM and UC MSCs, with the p-value obtained from the Mann-Whitney test (corresponding to Figure 3D).

| Marker Pair      | BM1      | BM2      | BM3      | BM4      | BM5      | BM6      | BM7      | BM Average | BM StdDev |
|------------------|----------|----------|----------|----------|----------|----------|----------|------------|-----------|
| ATF6_DAPI        | 0.196423 | 0.044327 | 0.092174 | 0.101055 | 0.290203 | 0.084216 | 0.036656 | 0.120722   | 0.091189  |
| ATF6_GOLPH4      | 0.886905 | 0.743921 | 0.736341 | 0.746596 | 0.684851 | 0.625186 | 0.474311 | 0.69973    | 0.127224  |
| ATF6_Nucleolin   | 0.16351  | 0.003114 | 0.063636 | 0.091991 | 0.249984 | 0.071487 | 0.035529 | 0.097036   | 0.083875  |
| ATF6_TOM20       | 0.830419 | 0.638131 | 0.704807 | 0.716485 | 0.709677 | 0.640397 | 0.625479 | 0.695056   | 0.070899  |
| DAPI_GOLPH4      | 0.258731 | -0.01459 | 0.032707 | 0.102173 | 0.326128 | 0.030444 | 0.002435 | 0.105432   | 0.134254  |
| DAPI_Nucleolin   | 0.900525 | 0.552446 | 0.927836 | 0.949862 | 0.90688  | 0.888909 | 0.956599 | 0.869008   | 0.141837  |
| DAPI_TOM20       | 0.165633 | 0.047519 | 0.170235 | 0.126379 | 0.25699  | 0.070878 | 0.083174 | 0.131544   | 0.07246   |
| GOLPH4_Nucleolin | 0.218046 | -0.01295 | 0.012693 | 0.084748 | 0.244019 | 0.0105   | -0.00011 | 0.079564   | 0.108318  |
| GOLPH4_TOM20     | 0.785866 | 0.52624  | 0.64621  | 0.776565 | 0.675298 | 0.616704 | 0.358623 | 0.626501   | 0.148656  |
| Nucleolin_TOM20  | 0.138058 | 0.008803 | 0.1439   | 0.108819 | 0.191075 | 0.062622 | 0.084286 | 0.105366   | 0.059871  |
| Marker Pair      | UC1      | UC2      | UC3      | UC4      | UC5      | UC6      | UC7      | UC Average | UC StdDev |
| ATF6_DAPI        | 0.407033 | 0.335367 | 0.578863 | 0.517145 | 0.41034  | 0.624892 | 0.398562 | 0.467457   | 0.107062  |
| ATF6_GOLPH4      | 0.572879 | 0.297727 | 0.651611 | 0.430775 | 0.27216  | 0.494814 | 0.344256 | 0.437746   | 0.143218  |
| ATF6_Nucleolin   | 0.36727  | 0.349333 | 0.583028 | 0.382364 | 0.110109 | 0.374694 | 0.123962 | 0.327251   | 0.16395   |
| ATF6_TOM20       | 0.808696 | 0.688347 | 0.801106 | 0.482706 | 0.392987 | 0.756106 | 0.621493 | 0.650206   | 0.161039  |
| DAPI_GOLPH4      | 0.114759 | 0.056249 | 0.205999 | 0.058438 | -0.00208 | 0.362382 | 0.058118 | 0.121981   | 0.124319  |
| DAPI_Nucleolin   | 0.875816 | 0.884637 | 0.837625 | 0.726613 | 0.375265 | 0.575322 | 0.503603 | 0.682697   | 0.200883  |
| DAPI_TOM20       | 0.217138 | 0.026181 | 0.28817  | 0.067537 | 0.011137 | 0.446522 | 0.10885  | 0.166505   | 0.159544  |
| GOLPH4_Nucleolin | 0.109928 | 0.066897 | 0.29133  | 0.030311 | -0.008   | 0.210649 | -0.00062 | 0.100072   | 0.113055  |
| GOLPH4_TOM20     | 0.575517 | 0.299882 | 0.659152 | 0.678319 | 0.480347 | 0.511235 | 0.439772 | 0.520603   | 0.131685  |
| Nucleolin_TOM20  | 0.207655 | 0.077855 | 0.352141 | 0.004792 | -0.00877 | 0.258247 | 0.002558 | 0.127783   | 0.144732  |

**Supplementary Table 7.** Pearson's correlation coefficient values for selected marker pairs for 7 BM and UC MSCs (corresponding to Figure 4A).

| Marker Pair      | BM1      | BM2      | BM3      | BM4      | BM5      | BM6      | BM7      | BM Average | BM StdDev |
|------------------|----------|----------|----------|----------|----------|----------|----------|------------|-----------|
| DAPI_ATF6        | 0.198657 | 0.039487 | 0.086898 | 0.093114 | 0.171108 | 0.067664 | 0.067568 | 0.103499   | 0.058711  |
| DAPI_GOLPH4      | 0.213441 | 0.018068 | 0.049052 | 0.09539  | 0.189666 | 0.035477 | 0.0349   | 0.090856   | 0.07964   |
| DAPI_Nucleolin   | 0.781629 | 0.432631 | 0.922132 | 0.944076 | 0.818159 | 0.871556 | 0.963145 | 0.819047   | 0.182802  |
| GOLPH4_ATF6      | 0.765817 | 0.618961 | 0.505556 | 0.597201 | 0.525747 | 0.468361 | 0.391373 | 0.553288   | 0.121021  |
| GOLPH4_DAPI      | 0.213441 | 0.018068 | 0.049052 | 0.09539  | 0.189666 | 0.035477 | 0.0349   | 0.090856   | 0.07964   |
| GOLPH4_Nucleolin | 0.203745 | 0.008078 | 0.039074 | 0.091449 | 0.153867 | 0.027703 | 0.033591 | 0.079644   | 0.073752  |
| Nucleolin_ATF6   | 0.185392 | 0.013872 | 0.074979 | 0.090165 | 0.141186 | 0.05908  | 0.066248 | 0.090132   | 0.056658  |
| Nucleolin_DAPI   | 0.781629 | 0.432631 | 0.922132 | 0.944076 | 0.818159 | 0.871556 | 0.963145 | 0.819047   | 0.182802  |
| Nucleolin_GOLPH4 | 0.203745 | 0.008078 | 0.039074 | 0.091449 | 0.153867 | 0.027703 | 0.033591 | 0.079644   | 0.073752  |
| TOM20_ATF6       | 0.713756 | 0.522471 | 0.444103 | 0.569148 | 0.48106  | 0.460904 | 0.446174 | 0.519659   | 0.096766  |
| TOM20_DAPI       | 0.175406 | 0.038659 | 0.092029 | 0.109527 | 0.217628 | 0.059561 | 0.079293 | 0.1103     | 0.06424   |
| TOM20_GOLPH4     | 0.636476 | 0.491008 | 0.423903 | 0.651613 | 0.48217  | 0.437755 | 0.273494 | 0.485203   | 0.130031  |
| TOM20_Nucleolin  | 0.165328 | 0.016058 | 0.08344  | 0.105156 | 0.172778 | 0.050871 | 0.078637 | 0.096039   | 0.057259  |
| Marker Pair      | UC1      | UC2      | UC3      | UC4      | UC5      | UC6      | UC7      | UC Average | UC StdDev |
| DAPI_ATF6        | 0.196808 | 0.092944 | 0.285006 | 0.271964 | 0.152621 | 0.290183 | 0.171751 | 0.208754   | 0.075846  |
| DAPI_GOLPH4      | 0.07593  | 0.029461 | 0.183259 | 0.086865 | 0.014359 | 0.231524 | 0.044002 | 0.095057   | 0.081912  |
| DAPI_Nucleolin   | 0.741429 | 0.761125 | 0.708505 | 0.665065 | 0.164178 | 0.370388 | 0.279771 | 0.527209   | 0.248358  |
| GOLPH4_ATF6      | 0.480053 | 0.303715 | 0.619116 | 0.419372 | 0.262292 | 0.418901 | 0.289242 | 0.398956   | 0.126258  |
| GOLPH4_DAPI      | 0.07593  | 0.029461 | 0.183259 | 0.086865 | 0.014359 | 0.231524 | 0.044002 | 0.095057   | 0.081912  |
| GOLPH4_Nucleolin | 0.071209 | 0.040352 | 0.236832 | 0.066246 | 0.000957 | 0.093926 | 0.006353 | 0.073696   | 0.079605  |
| Nucleolin_ATF6   | 0.173156 | 0.110506 | 0.324521 | 0.210464 | 0.024332 | 0.109092 | 0.041439 | 0.14193    | 0.104087  |
| Nucleolin_DAPI   | 0.741429 | 0.761125 | 0.708505 | 0.665065 | 0.164178 | 0.370388 | 0.279771 | 0.527209   | 0.248358  |

|                         |          |          |          |          |          |          |          |          |          |
|-------------------------|----------|----------|----------|----------|----------|----------|----------|----------|----------|
| <b>Nucleolin_GOLPH4</b> | 0.071209 | 0.040352 | 0.236832 | 0.066246 | 0.000957 | 0.093926 | 0.006353 | 0.073696 | 0.079605 |
| <b>TOM20_ATF6</b>       | 0.670208 | 0.56118  | 0.709138 | 0.455341 | 0.35816  | 0.642097 | 0.492202 | 0.555475 | 0.127329 |
| <b>TOM20_DAPI</b>       | 0.13406  | 0.025831 | 0.246479 | 0.077721 | 0.023136 | 0.27258  | 0.077346 | 0.12245  | 0.10107  |
| <b>TOM20_GOLPH4</b>     | 0.477261 | 0.30591  | 0.59053  | 0.585311 | 0.353276 | 0.419717 | 0.321136 | 0.436163 | 0.119095 |
| <b>TOM20_Nucleolin</b>  | 0.127179 | 0.0478   | 0.291461 | 0.051048 | 0.001147 | 0.111043 | 0.007882 | 0.09108  | 0.100283 |

**Supplementary Table 8.** Colocalization values for selected marker pairs for 7 BM and UC MSCs (corresponding to Figure 4B).

| <b>Marker Pair</b>   | <b>BM1</b> | <b>BM2</b> | <b>BM3</b> | <b>BM4</b> | <b>BM5</b> | <b>BM6</b> | <b>BM7</b> |
|----------------------|------------|------------|------------|------------|------------|------------|------------|
| <b>ATF6</b>          | 72077      | 53496      | 26147      | 92562      | 91513      | 137280     | 79126      |
| <b>BetaTubulin</b>   | 110718     | 43207      | 29110      | 137453     | 118420     | 162026     | 177176     |
| <b>ConcanavalinA</b> | 74479      | 58762      | 30292      | 147074     | 103561     | 167414     | 118167     |
| <b>DAPI</b>          | 18000      | 16198      | 10203      | 21401      | 26186      | 21884      | 24240      |
| <b>GOLPH4</b>        | 73537      | 44528      | 29841      | 86267      | 50304      | 127784     | 89119      |
| <b>HSP60</b>         | 106731     | 47291      | 43028      | 133622     | 92454      | 231791     | 156379     |
| <b>Nucleolin</b>     | 2158       | 1765       | 2572       | 1027       | 2498       | 887        | 707        |
| <b>Phalloidin</b>    | 116287     | 55108      | 36672      | 266663     | 174239     | 229626     | 289824     |
| <b>Sortilin</b>      | 61584      | 35704      | 31165      | 88538      | 76510      | 180883     | 52895      |
| <b>TOM20</b>         | 88060      | 49251      | 28398      | 160884     | 173177     | 185333     | 137833     |
| <b>WGA</b>           | 90379      | 50818      | 34451      | 138099     | 96925      | 231986     | 134474     |
| <b>Marker Pair</b>   | <b>UC1</b> | <b>UC2</b> | <b>UC3</b> | <b>UC4</b> | <b>UC5</b> | <b>UC6</b> | <b>UC7</b> |
| <b>ATF6</b>          | 95622      | 64911      | 64766      | 95730      | 40275      | 85629      | 254557     |
| <b>BetaTubulin</b>   | 198615     | 148244     | 154339     | 327964     | 208441     | 390137     | 664577     |
| <b>ConcanavalinA</b> | 119233     | 88994      | 105803     | 191096     | 78745      | 140352     | 295241     |
| <b>DAPI</b>          | 25724      | 23470      | 24846      | 23510      | 19394      | 26163      | 35329      |
| <b>GOLPH4</b>        | 105132     | 75821      | 69107      | 24267      | 31549      | 76274      | 77424      |
| <b>HSP60</b>         | 247370     | 125875     | 152705     | 348499     | 114527     | 298772     | 488934     |
| <b>Nucleolin</b>     | 10989      | 9814       | 3180       | 3860       | 2257       | 338        | 13433      |
| <b>Phalloidin</b>    | 145333     | 71630      | 76489      | 159617     | 53867      | 238990     | 301581     |
| <b>Sortilin</b>      | 178156     | 89586      | 70557      | 231671     | 88344      | 112341     | 413930     |
| <b>TOM20</b>         | 122737     | 75906      | 101154     | 116887     | 65806      | 124685     | 311985     |
| <b>WGA</b>           | 130533     | 83281      | 83649      | 110234     | 60433      | 110821     | 245917     |

**Supplementary Table 9.** Area of selected markers (in square pixels) for 7 BM and UC MSCs obtained from CellProfiler (corresponding to Figure 4C).

| Markers              | BM1    | BM2    | BM3    | BM4    | BM5    | BM6    | BM7    |
|----------------------|--------|--------|--------|--------|--------|--------|--------|
| <b>ATF6</b>          | 176.3  | 174.7  | 170.49 | 346.84 | 365.07 | 364.79 | 204.44 |
| <b>BetaTubulin</b>   | 242.35 | 152.8  | 182.2  | 408.64 | 429.67 | 383.02 | 278.02 |
| <b>ConcanavalinA</b> | 170.62 | 176.34 | 180.06 | 408.64 | 364.21 | 376.87 | 247.69 |
| <b>DAPI</b>          | 112.56 | 106.95 | 108.17 | 136.3  | 162.94 | 141.53 | 134.99 |
| <b>GOLPH4</b>        | 176.07 | 165.82 | 177.4  | 350.53 | 206.8  | 368.23 | 213.95 |
| <b>HSP60</b>         | 262.32 | 164.47 | 231.04 | 358.46 | 413.57 | 415.93 | 267.94 |
| <b>Nucleolin</b>     | 49.68  | 43.63  | 54.67  | 31.32  | 49.68  | 31.36  | 22.39  |
| <b>Phalloidin</b>    | 294.52 | 189.62 | 205.06 | 483.99 | 529.59 | 450.02 | 392.95 |
| <b>Sortilin</b>      | 168.3  | 139.98 | 194.53 | 253.56 | 286.93 | 416.2  | 183.64 |
| <b>TOM20</b>         | 194.56 | 167.36 | 187.51 | 449.22 | 571.29 | 418.18 | 249.73 |
| <b>WGA</b>           | 205.62 | 190.17 | 203.32 | 477.82 | 343.91 | 427.62 | 338.99 |
| Marker Pair          | UC1    | UC2    | UC3    | UC4    | UC5    | UC6    | UC7    |
| <b>ATF6</b>          | 185.82 | 212.52 | 214.96 | 245.46 | 200    | 269.98 | 408.79 |
| <b>BetaTubulin</b>   | 265.05 | 266.07 | 290.35 | 459.55 | 407.43 | 725.51 | 784.57 |
| <b>ConcanavalinA</b> | 213.64 | 230.11 | 239.23 | 294.85 | 292.19 | 337.3  | 591.77 |
| <b>DAPI</b>          | 137.03 | 137.16 | 141.49 | 138.21 | 122.38 | 141.31 | 162.41 |
| <b>GOLPH4</b>        | 232.78 | 221.8  | 172.72 | 141.47 | 159.68 | 281.32 | 344.52 |
| <b>HSP60</b>         | 276.84 | 254.91 | 293.33 | 544.46 | 315.08 | 687.99 | 668.44 |
| <b>Nucleolin</b>     | 88.48  | 101.56 | 76.11  | 59.14  | 49.53  | 17.05  | 134.58 |
| <b>Phalloidin</b>    | 222.84 | 215.17 | 211.21 | 284.31 | 235.53 | 660.83 | 651.93 |
| <b>Sortilin</b>      | 262.86 | 245.3  | 250.9  | 428.94 | 288.3  | 325.11 | 596.86 |
| <b>TOM20</b>         | 196.72 | 226.27 | 224.92 | 296.1  | 248.79 | 319.57 | 520.81 |
| <b>WGA</b>           | 212.29 | 232.73 | 240.43 | 249.75 | 247.39 | 289.91 | 473.24 |

**Supplementary Table 10.** Minor axis length (in pixels) of selected markers for 7 BM and UC MSCs obtained from CellProfiler (corresponding to Figure 4C).

| Markers              | BM1     | BM2    | BM3    | BM4     | BM5    | BM6     | BM7     |
|----------------------|---------|--------|--------|---------|--------|---------|---------|
| <b>ATF6</b>          | 636.77  | 468.73 | 205    | 561.16  | 452.47 | 615.57  | 541.14  |
| <b>BetaTubulin</b>   | 786.37  | 439.98 | 211.33 | 730.36  | 584.37 | 814.98  | 978.95  |
| <b>ConcanavalinA</b> | 640.94  | 506.47 | 223.28 | 761.49  | 528.2  | 820.95  | 720.3   |
| <b>DAPI</b>          | 208.99  | 195.66 | 121.24 | 200.28  | 205    | 197.94  | 229.06  |
| <b>GOLPH4</b>        | 622.37  | 419.11 | 223.93 | 517.1   | 396.7  | 657.58  | 597.29  |
| <b>HSP60</b>         | 770.53  | 413.77 | 268.36 | 595.57  | 522.41 | 1021.36 | 905.55  |
| <b>Nucleolin</b>     | 62.28   | 54.54  | 82.92  | 45.92   | 84.07  | 38.14   | 74.5    |
| <b>Phalloidin</b>    | 778.68  | 466.74 | 246.71 | 930.7   | 648.23 | 1033.74 | 1100.64 |
| <b>Sortilin</b>      | 597.71  | 365.05 | 210.77 | 557.17  | 423.54 | 888.56  | 445.49  |
| <b>TOM20</b>         | 684.36  | 426.75 | 201.95 | 699.62  | 720.06 | 777.22  | 882.11  |
| <b>WGA</b>           | 636.04  | 372.98 | 223.66 | 592.63  | 494.12 | 987.44  | 626.13  |
| Marker Pair          | UC1     | UC2    | UC3    | UC4     | UC5    | UC6     | UC7     |
| <b>ATF6</b>          | 706.87  | 411.92 | 421.99 | 599.38  | 277.71 | 434.69  | 1224.38 |
| <b>BetaTubulin</b>   | 1250.36 | 838.92 | 809.9  | 1348.87 | 690.34 | 1107.8  | 2171.82 |
| <b>ConcanavalinA</b> | 789     | 526.44 | 588.51 | 1241.91 | 401.95 | 600     | 1221.41 |
| <b>DAPI</b>          | 239.54  | 218.48 | 224.92 | 217.11  | 202.73 | 236.91  | 278.46  |
| <b>GOLPH4</b>        | 725.69  | 499.68 | 590.89 | 220.42  | 269.98 | 456.84  | 485.73  |
| <b>HSP60</b>         | 1671.15 | 854.78 | 775.68 | 1174.6  | 511.22 | 982.07  | 1895.63 |
| <b>Nucleolin</b>     | 167.38  | 154.58 | 96.8   | 85.34   | 86.67  | 25.81   | 178.18  |
| <b>Phalloidin</b>    | 949.26  | 451.44 | 498.97 | 1068.1  | 308.68 | 953.85  | 1273.32 |
| <b>Sortilin</b>      | 990.55  | 505.19 | 397.59 | 1167.73 | 423.1  | 577.23  | 1374.41 |
| <b>TOM20</b>         | 858.92  | 482.38 | 649.79 | 879.06  | 393.58 | 583.23  | 1130.1  |
| <b>WGA</b>           | 870.18  | 483.5  | 483.86 | 767.4   | 318.4  | 564.18  | 1079.46 |

**Supplementary Table 11.** Major axis length (in pixels) of selected markers for 7 BM and UC MSCs obtained from CellProfiler (corresponding to Figure 4C).

| Cell     | TOM20 vs HSP60 |          | GOLPH4 vs Sortilin |    |
|----------|----------------|----------|--------------------|----|
|          | BM             | UC       | BM                 | UC |
| <b>1</b> | 4.9E-106       | 0        | 8.1E-193           | 0  |
| <b>2</b> | 0              | 0        | 2.5E-230           | 0  |
| <b>3</b> | 0              | 8.9E-288 | 0                  | 0  |
| <b>4</b> | 3.61E-30       | 1.08E-21 | 0                  | 0  |
| <b>5</b> | 1.05E-67       | 0        | 0                  | 0  |
| <b>6</b> | 1.3E-190       | 0        | 0                  | 0  |
| <b>7</b> | 4.41E-91       | 0        | 0                  | 0  |

**Supplementary Table 12.** Raw p-values obtained from the KS Hypothesis test for TOM20 vs HSP60 and GOLPH4 vs Sortilin (corresponding to Figure 4D).



## References

1. Cappello, F., Conway de Macario, E., Marasà, L., Zummo, G. & Macario, A. J. L. Hsp60 expression, new locations, functions, and perspectives for cancer diagnosis and therapy. *Cancer Biology & Therapy* **7**, 801–809 (2008).
2. Merendino, A. M. *et al.* Hsp60 Is Actively Secreted by Human Tumor Cells. *PLOS ONE* **5**, e9247 (2010).
3. Recombinant Anti-Hsp60 antibody [EPR18245-93] - BSA and Azide free (ab224528). <https://www.abcam.com/Hsp60-antibody-EPR18245-93-BSA-and-Azide-free-ab224528.html>.
4. Bhagawati, M. *et al.* The receptor subunit Tom20 is dynamically associated with the TOM complex in mitochondria of human cells. *MBoC* **32**, br1 (2021).
5. Anti-Tom20 Antibody (F-10). <https://www.scbt.com/p/tom20-antibody-f-10>.
6. Hillary, R. F. & FitzGerald, U. A lifetime of stress: ATF6 in development and homeostasis. *Journal of Biomedical Science* **25**, 48 (2018).
7. Recombinant Anti-ATF6 antibody [EPR22690-84] - BSA and Azide free KO Tested (ab263955). <https://www.abcam.com/atf6-antibody-epr22690-84-bsa-and-azide-free-ab263955.html>.
8. Lujan, P. & Campelo, F. Should I stay or should I go? Golgi membrane spatial organization for protein sorting and retention. *Archives of Biochemistry and Biophysics* **707**, 108921 (2021).
9. Recombinant Anti-GOLPH4/GPP130 antibody [EPR13439] KO Tested (ab197595) | Abcam. <https://www.abcam.com/golph4gpp130-antibody-epr13439-ab197595.html>.
10. Kjolby, M., Nielsen, M. S. & Petersen, C. M. Sortilin, Encoded by the Cardiovascular Risk Gene SORT1, and Its Suggested Functions in Cardiovascular Disease. *Curr Atheroscler Rep* **17**, 18 (2015).
11. Recombinant Anti-Sortilin/NT3 antibody [EPR23093-58] - BSA and Azide free (ab263873). <https://www.abcam.com/sortilinnt3-antibody-epr23093-58-bsa-and-azide-free-ab263873.html>.
12. Concanavalin A, Alexa Fluor 488 Conjugate. <https://www.thermofisher.com/order/catalog/product/C11252>.
13. Bray, M.-A. *et al.* Cell Painting, a high-content image-based assay for morphological profiling using multiplexed fluorescent dyes. *Nat Protoc* **11**, 1757–1774 (2016).
14. Alexa Fluor 555 Phalloidin. <https://www.thermofisher.com/order/catalog/product/A34055>.
15. Wheat Germ Agglutinin, Alexa Fluor 647 Conjugate. <https://www.thermofisher.com/order/catalog/product/W32466>.
16. Recombinant Anti-Nucleolin antibody [EPR7952] - BSA and Azide free (ab226113). <https://www.abcam.com/nucleolin-antibody-epr7952-bsa-and-azide-free-ab226113.html>.
17. Anti- $\beta$  Tubulin Antibody (D-10). [https://www.scbt.com/p/beta-tubulin-antibody-d-10;jsessionid=g0cw-4HJEYyJsQi4LQp75hxE-9PtyQdjUrVTyytURt6f\\_laA6hUh!1267813408](https://www.scbt.com/p/beta-tubulin-antibody-d-10;jsessionid=g0cw-4HJEYyJsQi4LQp75hxE-9PtyQdjUrVTyytURt6f_laA6hUh!1267813408).
